# Supplementary material for: Extracellular microRNAs profile in human follicular fluid and IVF outcomes
Source: PubMed Central journal article supplement (PMC6242846; doi:10.1038/s41598-018-35379-3), 2018-11-19
Supplement: 41598_2018_35379_MOESM1_ESM.pdf [file 41598_2018_35379_MOESM1_ESM.pdf]

## **Extracellular microRNAs profile in human follicular fluid and IVF outcomes**

Rosie M Martinez<sup>1</sup>, Liming Liang<sup>2</sup>, Catherine Racowsky<sup>3</sup>, Laura Dioni<sup>4</sup>, Abdallah Mansur<sup>5</sup>, Michal Adir<sup>5</sup>,  
Valentina Bollati<sup>4</sup>, Andrea A Baccarelli<sup>6</sup>, Russ Hauser<sup>7</sup>, Ronit Machtinger<sup>5,\*</sup>

Supplemental Table S1: All EV-miRNAs and their % detected, mean Ct and SD of normalized and unnormalized data among 126 samples

| Mature EV-miRNA name | Percent Detected in 126 FF Samples | Mean Ct of Normalized Data ^ | SD Ct of Normalized Data | Mean Ct of Unnormalized Data ** | SD Ct of Unnormalized Data |
|----------------------|------------------------------------|------------------------------|--------------------------|---------------------------------|----------------------------|
| hsa-miR-106a-5p      | 100%                               | -8.22                        | 1.08                     | 18.84                           | 1.43                       |
| hsa-miR-106b-5p      | 100%                               | -5.50                        | 1.12                     | 21.56                           | 1.47                       |
| hsa-miR-1274B        | 100%                               | -12.14                       | 1.12                     | 14.93                           | 1.42                       |
| hsa-miR-132-3p       | 100%                               | -10.25                       | 1.59                     | 16.82                           | 1.91                       |
| hsa-miR-16-5p        | 100%                               | -5.27                        | 1.61                     | 21.79                           | 1.95                       |
| hsa-miR-17-5p        | 100%                               | -8.32                        | 1.06                     | 18.75                           | 1.41                       |
| hsa-miR-193b-3p      | 100%                               | -9.76                        | 1.21                     | 17.30                           | 1.50                       |
| hsa-miR-203a-3p      | 100%                               | -6.15                        | 1.25                     | 20.91                           | 1.52                       |
| hsa-miR-20a-5p       | 100%                               | -9.81                        | 1.08                     | 17.25                           | 1.42                       |
| hsa-miR-212-3p       | 100%                               | -6.51                        | 1.27                     | 20.55                           | 1.57                       |
| hsa-miR-218-5p       | 100%                               | -4.05                        | 1.18                     | 23.01                           | 1.50                       |
| hsa-miR-223-3p       | 100%                               | -8.20                        | 2.04                     | 18.86                           | 2.29                       |
| hsa-miR-26a-5p       | 100%                               | -6.10                        | 1.32                     | 20.96                           | 1.66                       |
| hsa-miR-28-5p        | 100%                               | -4.45                        | 1.24                     | 22.62                           | 1.58                       |
| hsa-miR-30a-5p       | 100%                               | -7.43                        | 1.45                     | 19.63                           | 1.79                       |
| hsa-miR-30b-5p       | 100%                               | -9.20                        | 1.36                     | 17.86                           | 1.69                       |
| hsa-miR-320a         | 100%                               | -8.74                        | 1.27                     | 18.32                           | 1.59                       |
| hsa-miR-328-3p       | 100%                               | -6.78                        | 1.31                     | 20.28                           | 1.64                       |
| hsa-miR-331-3p       | 100%                               | -5.84                        | 1.16                     | 21.22                           | 1.50                       |
| hsa-miR-483-5p       | 100%                               | -10.31                       | 1.25                     | 16.75                           | 1.49                       |
| hsa-miR-92a-3p       | 100%                               | -9.50                        | 1.27                     | 17.56                           | 1.60                       |
| hsa-miR-99b-5p       | 100%                               | -7.25                        | 1.20                     | 19.82                           | 1.55                       |
| hsa-let-7c-5p        | 99%                                | -4.96                        | 1.42                     | 22.10                           | 1.75                       |
| hsa-miR-127-3p       | 99%                                | -5.96                        | 1.33                     | 21.10                           | 1.61                       |
| hsa-miR-130a-3p      | 99%                                | -5.01                        | 1.69                     | 22.05                           | 2.04                       |
| hsa-miR-146b-5p      | 99%                                | -3.86                        | 1.57                     | 23.20                           | 1.91                       |
| hsa-miR-191-5p       | 99%                                | -7.88                        | 1.41                     | 19.18                           | 1.72                       |
| hsa-miR-195-5p       | 99%                                | -4.39                        | 1.51                     | 22.67                           | 1.86                       |
| hsa-miR-26b-5p       | 99%                                | -4.44                        | 1.36                     | 22.62                           | 1.69                       |
| hsa-miR-720          | 99%                                | -7.74                        | 1.22                     | 19.32                           | 1.48                       |
| hsa-miR-886-3p       | 99%                                | -4.99                        | 1.67                     | 22.07                           | 1.90                       |
| hsa-miR-125b-5p      | 98%                                | -7.23                        | 1.82                     | 19.83                           | 2.13                       |
| hsa-miR-15b-5p       | 98%                                | -4.90                        | 1.36                     | 22.16                           | 1.70                       |
| hsa-miR-19b-3p       | 98%                                | -9.23                        | 1.92                     | 17.83                           | 2.17                       |
| hsa-miR-202-3p       | 98%                                | -4.50                        | 1.60                     | 22.56                           | 1.87                       |
| hsa-miR-24-3p        | 98%                                | -8.32                        | 1.76                     | 18.74                           | 2.04                       |
| hsa-miR-30c-5p       | 98%                                | -9.23                        | 1.86                     | 17.83                           | 2.15                       |
| hsa-miR-451a         | 98%                                | -5.85                        | 2.22                     | 21.22                           | 2.44                       |

|                 |     |       |      |       |      |
|-----------------|-----|-------|------|-------|------|
| hsa-miR-25-3p   | 98% | -4.66 | 1.72 | 22.40 | 2.06 |
| hsa-miR-30d-5p  | 98% | -3.97 | 1.69 | 23.09 | 2.02 |
| hsa-miR-374a-5p | 98% | -3.37 | 1.46 | 23.69 | 1.78 |
| hsa-miR-484     | 98% | -6.85 | 1.81 | 20.21 | 2.10 |
| hsa-miR-572     | 98% | -2.34 | 1.59 | 24.72 | 1.61 |
| hsa-miR-1274A   | 97% | -6.66 | 1.79 | 20.40 | 2.06 |
| hsa-miR-150-5p  | 97% | -4.99 | 1.87 | 22.07 | 2.15 |
| hsa-miR-130b-3p | 95% | -3.02 | 1.50 | 24.04 | 1.83 |
| hsa-miR-29a-3p  | 95% | -3.08 | 1.67 | 23.98 | 2.02 |
| hsa-miR-31-5    | 95% | -4.74 | 1.62 | 22.32 | 1.91 |
| hsa-miR-376a-3p | 95% | -3.44 | 1.48 | 23.62 | 1.79 |
| hsa-miR-424-3p  | 95% | -4.73 | 1.56 | 22.33 | 1.79 |
| hsa-miR-590-5p  | 95% | -2.60 | 1.49 | 24.46 | 1.78 |
| hsa-miR-103a-3p | 94% | -3.22 | 1.45 | 23.84 | 1.76 |
| hsa-miR-146a-5p | 94% | -3.93 | 2.05 | 23.13 | 2.37 |
| hsa-miR-324-5p  | 94% | -2.79 | 1.39 | 24.27 | 1.71 |
| hsa-miR-574-3p  | 94% | -6.10 | 1.93 | 20.96 | 2.23 |
| hsa-miR-424-5p  | 94% | -3.14 | 1.55 | 23.92 | 1.88 |
| hsa-miR-503-5p  | 94% | -2.54 | 1.23 | 24.53 | 1.53 |
| hsa-miR-99a-5p  | 94% | -5.66 | 2.00 | 21.40 | 2.30 |
| hsa-miR-335-5p  | 93% | -2.94 | 1.68 | 24.12 | 1.99 |
| hsa-miR-192-5p  | 92% | -2.89 | 1.78 | 24.18 | 1.98 |
| hsa-miR-19a-3p  | 91% | -3.38 | 1.70 | 23.68 | 2.02 |
| hsa-miR-375     | 91% | -3.17 | 1.79 | 23.89 | 2.10 |
| hsa-miR-152-3p  | 90% | -3.09 | 1.71 | 23.97 | 2.04 |
| hsa-miR-411-5p  | 90% | -2.31 | 1.41 | 24.76 | 1.71 |
| hsa-miR-27b-3p  | 90% | -3.16 | 1.59 | 23.90 | 1.91 |
| hsa-miR-660-5p  | 90% | -2.66 | 1.59 | 24.40 | 1.93 |
| hsa-miR-126-3p  | 89% | -3.11 | 2.16 | 23.96 | 2.46 |
| hsa-miR-142-3p  | 89% | -2.92 | 2.05 | 24.14 | 2.33 |
| hsa-miR-181a-5p | 89% | -2.69 | 1.57 | 24.37 | 1.89 |
| hsa-miR-30a-3p  | 89% | -4.28 | 2.05 | 22.78 | 2.34 |
| hsa-miR-30e-3p  | 89% | -4.13 | 2.23 | 22.93 | 2.49 |
| hsa-miR-374b-5p | 89% | -2.38 | 1.47 | 24.68 | 1.79 |
| hsa-miR-186-5p  | 88% | -2.44 | 1.70 | 24.62 | 2.02 |
| hsa-miR-222-3p  | 88% | -3.35 | 2.16 | 23.71 | 2.48 |
| hsa-miR-29c-3p  | 88% | -2.88 | 2.00 | 24.19 | 2.31 |
| hsa-miR-204-5p  | 87% | -3.29 | 1.99 | 23.77 | 2.29 |
| hsa-miR-21-5p   | 87% | -6.98 | 3.35 | 20.08 | 3.63 |
| hsa-miR-376c-3p | 87% | -2.96 | 1.97 | 24.10 | 2.27 |
| hsa-miR-886-5p  | 87% | -2.06 | 1.60 | 25.00 | 1.82 |
| hsa-miR-140-5p  | 86% | -2.13 | 1.49 | 24.94 | 1.83 |
| hsa-miR-532-5p  | 85% | -2.34 | 1.58 | 24.72 | 1.92 |

|                 |     |       |      |       |      |
|-----------------|-----|-------|------|-------|------|
| hsa-miR-942-5p  | 85% | -1.55 | 1.26 | 25.51 | 1.53 |
| hsa-let-7d-5p   | 83% | -1.68 | 1.32 | 25.38 | 1.65 |
| hsa-miR-100-5p  | 82% | -4.95 | 2.85 | 22.11 | 3.13 |
| hsa-let-7g-5p   | 81% | -1.99 | 1.55 | 25.07 | 1.81 |
| hsa-miR-148a-3p | 79% | -3.38 | 2.33 | 23.68 | 2.64 |
| hsa-miR-301a-3p | 79% | -1.51 | 1.36 | 25.55 | 1.68 |
| hsa-miR-361-5p  | 79% | -2.19 | 1.68 | 24.87 | 2.01 |
| hsa-miR-409-3p  | 79% | -4.31 | 2.70 | 22.75 | 2.93 |
| hsa-miR-126-5p  | 78% | -1.75 | 1.86 | 25.31 | 2.15 |
| hsa-miR-1291    | 78% | -1.36 | 1.34 | 25.71 | 1.60 |
| hsa-miR-31-3    | 78% | -1.35 | 1.32 | 25.71 | 1.64 |
| hsa-miR-410-3p  | 78% | -1.47 | 1.43 | 25.59 | 1.73 |
| hsa-miR-645     | 78% | -0.58 | 1.02 | 26.48 | 0.94 |
| hsa-miR-320b    | 77% | -1.37 | 1.40 | 25.69 | 1.70 |
| hsa-miR-365a-3p | 77% | -2.23 | 2.04 | 24.83 | 2.38 |
| hsa-miR-28-3p   | 75% | -3.81 | 2.63 | 23.26 | 2.91 |
| hsa-miR-34a-5p  | 75% | -4.48 | 2.93 | 22.58 | 3.17 |
| hsa-miR-143-3p  | 75% | -1.55 | 1.68 | 25.51 | 1.98 |
| hsa-miR-139-5p  | 73% | -1.92 | 1.79 | 25.14 | 2.08 |
| hsa-miR-324-3p  | 73% | -1.15 | 1.35 | 25.92 | 1.65 |
| hsa-miR-63      | 72% | -1.65 | 1.68 | 25.41 | 1.76 |
| hsa-miR-93-5p   | 72% | -2.62 | 2.07 | 24.44 | 2.39 |
| hsa-miR-423-5p  | 71% | -1.85 | 1.82 | 25.21 | 2.13 |
| hsa-miR-509-5p  | 71% | -2.01 | 1.93 | 25.05 | 2.20 |
| hsa-miR-210-3p  | 69% | -5.91 | 4.42 | 21.15 | 4.69 |
| hsa-miR-221-3p  | 69% | -3.07 | 2.68 | 23.99 | 2.99 |
| hsa-miR-296-5p  | 66% | -2.46 | 2.62 | 24.60 | 2.83 |
| hsa-miR-29b-3p  | 65% | -0.96 | 1.38 | 26.10 | 1.68 |
| hsa-miR-145-5p  | 64% | -2.33 | 2.67 | 24.73 | 2.93 |
| hsa-miR-597-5p  | 62% | -0.55 | 1.16 | 26.51 | 1.24 |
| hsa-miR-15a-5p  | 61% | -0.49 | 1.08 | 26.57 | 1.38 |
| hsa-let-7e-5p   | 60% | -3.70 | 3.62 | 23.36 | 3.88 |
| hsa-miR-34a-3   | 60% | -0.61 | 1.25 | 26.45 | 1.54 |
| hsa-miR-708-5p  | 60% | -0.71 | 1.56 | 26.35 | 1.80 |
| hsa-miR-744-5p  | 60% | -0.68 | 1.27 | 26.38 | 1.59 |
| hsa-miR-134-5p  | 59% | -0.84 | 1.46 | 26.22 | 1.73 |
| hsa-miR-27a-3p  | 58% | -1.12 | 1.75 | 25.94 | 2.04 |
| hsa-miR-345-5p  | 58% | -0.45 | 1.14 | 26.61 | 1.46 |
| hsa-miR-483-3   | 57% | -2.67 | 3.13 | 24.39 | 3.25 |
| hsa-miR-508-3   | 57% | -0.69 | 1.41 | 26.37 | 1.69 |
| hsa-miR-193a-5p | 56% | -0.54 | 1.37 | 26.52 | 1.68 |
| hsa-miR-95-3p   | 56% | -0.50 | 1.24 | 26.56 | 1.52 |
| hsa-miR-205-5p  | 55% | -0.66 | 1.72 | 26.40 | 1.86 |

|                 |     |       |      |       |      |
|-----------------|-----|-------|------|-------|------|
| hsa-miR-532-3p  | 55% | -0.49 | 1.30 | 26.57 | 1.62 |
| hsa-miR-629-3   | 55% | -0.37 | 1.16 | 26.69 | 1.40 |
| hsa-miR-184     | 54% | -0.52 | 1.40 | 26.54 | 1.51 |
| hsa-miR-193b-5p | 54% | -1.57 | 2.21 | 25.49 | 2.47 |
| hsa-miR-128-3p  | 53% | -0.29 | 1.02 | 26.77 | 1.34 |
| hsa-miR-125a-5p | 52% | -0.57 | 1.38 | 26.50 | 1.68 |
| hsa-miR-10a-5p  | 52% | -0.60 | 1.80 | 26.46 | 2.02 |
| hsa-miR-885-5p  | 52% | -0.78 | 1.96 | 26.28 | 2.22 |
| hsa-miR-10b-3   | 51% | -0.68 | 1.64 | 26.38 | 1.93 |
| hsa-miR-1290    | 50% | -0.61 | 1.62 | 26.45 | 1.75 |
| hsa-miR-151a-3p | 49% | -0.40 | 1.28 | 26.66 | 1.59 |
| hsa-miR-22-5p   | 49% | -0.40 | 1.18 | 26.66 | 1.46 |
| hsa-miR-454-3p  | 49% | -0.99 | 2.70 | 26.07 | 2.84 |
| hsa-miR-543     | 48% | -0.03 | 0.91 | 27.03 | 1.15 |
| hsa-miR-601     | 48% | -0.48 | 2.21 | 26.58 | 2.29 |
| hsa-miR-323a-3p | 46% | -0.34 | 1.36 | 26.73 | 1.63 |
| hsa-miR-379-5p  | 46% | -0.38 | 1.32 | 26.68 | 1.55 |
| hsa-miR-495-3p  | 45% | -0.83 | 1.82 | 26.23 | 2.11 |
| hsa-miR-148b-3p | 44% | -0.21 | 1.15 | 26.85 | 1.47 |
| hsa-miR-135a-5p | 42% | -0.26 | 1.49 | 26.81 | 1.72 |
| hsa-miR-20b-5p  | 42% | -0.29 | 1.32 | 26.77 | 1.60 |
| hsa-miR-214-3p  | 41% | -1.51 | 2.87 | 25.55 | 3.11 |
| hsa-miR-542-3p  | 40% | 0.11  | 0.92 | 27.17 | 1.14 |
| hsa-miR-200b-3p | 39% | -0.41 | 1.69 | 26.65 | 1.91 |
| hsa-miR-149-5p  | 37% | -1.04 | 2.34 | 26.02 | 2.63 |
| hsa-miR-194-5p  | 37% | -0.09 | 1.41 | 26.97 | 1.62 |
| hsa-miR-491-5p  | 37% | -0.03 | 1.09 | 27.03 | 1.34 |
| hsa-miR-7-1-3p  | 37% | -1.11 | 2.48 | 25.95 | 2.74 |
| hsa-miR-29a-5p  | 36% | 0.14  | 0.96 | 27.20 | 1.20 |
| hsa-miR-497-5p  | 36% | 0.08  | 1.08 | 27.15 | 1.33 |
| hsa-miR-133a-3p | 34% | -0.39 | 1.73 | 26.67 | 1.94 |
| hsa-miR-185-5p  | 33% | 0.22  | 0.90 | 27.28 | 1.16 |
| hsa-miR-1303    | 33% | 0.07  | 1.33 | 27.13 | 1.37 |
| hsa-miR-1180-3p | 32% | 0.36  | 0.70 | 27.42 | 0.93 |
| hsa-miR-455-5p  | 30% | 0.36  | 0.76 | 27.42 | 1.01 |
| hsa-miR-548b-5  | 30% | 0.32  | 1.02 | 27.39 | 1.13 |
| hsa-miR-598-3p  | 28% | 0.39  | 0.74 | 27.46 | 0.97 |
| hsa-miR-101-3p  | 27% | 0.34  | 0.90 | 27.40 | 1.16 |
| hsa-let-7a-5p   | 26% | -1.41 | 3.75 | 25.65 | 3.99 |
| hsa-miR-10b-5p  | 25% | 0.13  | 1.41 | 27.19 | 1.64 |
| hsa-miR-1226-5  | 25% | 0.00  | 1.45 | 27.06 | 1.66 |
| hsa-miR-190a-5p | 25% | 0.33  | 1.02 | 27.40 | 1.21 |
| hsa-miR-202-5p  | 25% | 0.24  | 1.12 | 27.30 | 1.30 |

|                  |     |       |      |       |      |
|------------------|-----|-------|------|-------|------|
| hsa-miR-769-5    | 25% | 0.29  | 0.96 | 27.35 | 1.17 |
| hsa-miR-99b-3p   | 25% | 0.14  | 1.29 | 27.20 | 1.40 |
| hsa-miR-18a-5p   | 24% | 0.18  | 1.20 | 27.24 | 1.43 |
| hsa-miR-339-3p   | 23% | 0.47  | 0.71 | 27.53 | 0.95 |
| hsa-miR-339-5p   | 23% | -0.57 | 2.56 | 26.49 | 2.80 |
| hsa-miR-342-3p   | 23% | 0.10  | 1.52 | 27.16 | 1.72 |
| hsa-miR-652-3p   | 23% | 0.22  | 1.23 | 27.28 | 1.47 |
| hsa-miR-141-3p   | 22% | -0.24 | 2.19 | 26.82 | 2.36 |
| hsa-miR-539-5p   | 22% | 0.53  | 0.69 | 27.59 | 0.85 |
| hsa-miR-381-3p   | 21% | 0.59  | 0.64 | 27.65 | 0.70 |
| hsa-miR-199a-3p  | 20% | -0.05 | 1.98 | 27.01 | 2.07 |
| hsa-miR-122-5p   | 19% | 0.20  | 1.49 | 27.26 | 1.59 |
| hsa-miR-144-5    | 19% | 0.30  | 1.32 | 27.36 | 1.50 |
| hsa-miR-34b-3p   | 18% | -0.02 | 2.10 | 27.04 | 2.29 |
| hsa-miR-766-3p   | 18% | 0.14  | 1.55 | 27.20 | 1.76 |
| hsa-miR-888-5p   | 18% | 0.11  | 2.22 | 27.17 | 2.25 |
| hsa-miR-98-5p    | 18% | -0.17 | 2.33 | 26.89 | 2.40 |
| hsa-miR-155-5p   | 17% | 0.52  | 1.11 | 27.58 | 1.21 |
| hsa-miR-449b-5p  | 17% | 0.31  | 1.34 | 27.37 | 1.50 |
| hsa-miR-487b-3p  | 17% | 0.65  | 0.56 | 27.71 | 0.69 |
| hsa-miR-93-3p    | 17% | 0.58  | 0.65 | 27.64 | 0.86 |
| hsa-miR-34c-5p   | 16% | 0.40  | 1.21 | 27.46 | 1.40 |
| hsa-miR-199a-5p  | 15% | 0.60  | 0.76 | 27.66 | 0.90 |
| hsa-miR-370-3p   | 15% | -0.03 | 2.14 | 27.03 | 2.32 |
| hsa-miR-548am-5p | 15% | 0.70  | 0.58 | 27.76 | 0.59 |
| hsa-miR-135b-5p  | 14% | 0.62  | 0.70 | 27.68 | 0.87 |
| hsa-miR-146b-3p  | 14% | 0.70  | 0.47 | 27.76 | 0.63 |
| hsa-miR-224-5    | 14% | 0.50  | 0.99 | 27.56 | 1.18 |
| hsa-miR-889-3p   | 14% | 0.66  | 0.59 | 27.72 | 0.73 |
| hsa-miR-136-3p   | 13% | 0.71  | 0.51 | 27.77 | 0.63 |
| hsa-miR-206      | 13% | 0.70  | 0.72 | 27.76 | 0.71 |
| hsa-miR-362-5p   | 13% | 0.66  | 0.60 | 27.73 | 0.74 |
| hsa-miR-502-5p   | 13% | 0.71  | 0.55 | 27.77 | 0.63 |
| hsa-miR-372-3p   | 13% | 0.76  | 0.50 | 27.82 | 0.51 |
| hsa-miR-506-3p   | 12% | 0.68  | 0.67 | 27.74 | 0.77 |
| hsa-miR-505-3p   | 11% | 0.71  | 0.53 | 27.77 | 0.66 |
| hsa-miR-625-3    | 11% | 0.65  | 0.83 | 27.71 | 0.92 |
| hsa-miR-124-3p   | 10% | 0.75  | 0.54 | 27.81 | 0.59 |
| hsa-miR-369-3p   | 10% | 0.01  | 2.62 | 27.07 | 2.76 |
| hsa-miR-382-5p   | 10% | 0.68  | 0.73 | 27.74 | 0.83 |
| hsa-miR-449a     | 10% | 0.76  | 0.47 | 27.82 | 0.55 |
| hsa-miR-488-5p   | 10% | 0.72  | 0.64 | 27.78 | 0.72 |
| hsa-miR-494-3p   | 10% | 0.76  | 0.51 | 27.82 | 0.54 |

|                  |     |      |      |       |      |
|------------------|-----|------|------|-------|------|
| hsa-miR-548d-5   | 10% | 0.36 | 2.09 | 27.42 | 2.13 |
| hsa-miR-758-3p   | 10% | 0.78 | 0.52 | 27.84 | 0.49 |
| hsa-miR-1244     | 10% | 0.80 | 0.46 | 27.86 | 0.45 |
| hsa-miR-520c-3p  | 10% | 0.59 | 1.30 | 27.65 | 1.30 |
| hsa-miR-154-3p   | 9%  | 0.82 | 0.48 | 27.88 | 0.40 |
| hsa-miR-425-3p   | 9%  | 0.77 | 0.51 | 27.83 | 0.58 |
| hsa-miR-373-3p   | 8%  | 0.82 | 0.54 | 27.88 | 0.42 |
| hsa-miR-429      | 8%  | 0.78 | 0.57 | 27.84 | 0.64 |
| hsa-miR-500a-5p  | 8%  | 0.77 | 0.51 | 27.83 | 0.61 |
| hsa-miR-642a-5p  | 8%  | 0.70 | 0.76 | 27.76 | 0.89 |
| hsa-miR-107      | 7%  | 0.82 | 0.47 | 27.88 | 0.46 |
| hsa-miR-151a-5p  | 7%  | 0.80 | 0.45 | 27.86 | 0.54 |
| hsa-miR-181a-2-3 | 7%  | 0.83 | 0.38 | 27.89 | 0.43 |
| hsa-miR-200c-3p  | 7%  | 0.32 | 2.14 | 27.38 | 2.26 |
| hsa-miR-330-3p   | 7%  | 0.76 | 0.62 | 27.82 | 0.72 |
| hsa-miR-340-3p   | 7%  | 0.82 | 0.43 | 27.88 | 0.46 |
| hsa-miR-378      | 7%  | 0.77 | 0.57 | 27.83 | 0.65 |
| hsa-miR-576-3p   | 7%  | 0.82 | 0.42 | 27.88 | 0.44 |
| hsa-miR-663b     | 7%  | 0.63 | 1.19 | 27.69 | 1.18 |
| hsa-miR-744-3p   | 7%  | 0.83 | 0.45 | 27.89 | 0.42 |
| hsa-miR-99a-3    | 7%  | 0.82 | 0.41 | 27.88 | 0.46 |
| hsa-miR-1271-5p  | 6%  | 0.82 | 0.45 | 27.88 | 0.48 |
| hsa-miR-383-5p   | 6%  | 0.56 | 1.31 | 27.62 | 1.47 |
| hsa-miR-432-5p   | 6%  | 0.82 | 0.52 | 27.88 | 0.48 |
| hsa-miR-510-5    | 6%  | 0.78 | 0.67 | 27.84 | 0.64 |
| hsa-miR-1227-3   | 6%  | 0.82 | 0.56 | 27.88 | 0.51 |
| hsa-miR-140-3p   | 6%  | 0.85 | 0.37 | 27.91 | 0.39 |
| hsa-miR-20a-3    | 6%  | 0.84 | 0.40 | 27.91 | 0.41 |
| hsa-miR-223-5    | 6%  | 0.85 | 0.41 | 27.91 | 0.38 |
| hsa-miR-27a-5p   | 6%  | 0.85 | 0.37 | 27.91 | 0.36 |
| hsa-miR-27b-5p   | 6%  | 0.85 | 0.40 | 27.91 | 0.39 |
| hsa-miR-520b     | 6%  | 0.87 | 0.47 | 27.93 | 0.29 |
| hsa-miR-520e     | 6%  | 0.62 | 1.67 | 27.69 | 1.67 |
| hsa-miR-590-3p   | 6%  | 0.85 | 0.39 | 27.91 | 0.40 |
| hsa-miR-9-5p     | 6%  | 0.67 | 1.06 | 27.73 | 1.16 |
| hsa-miR-200a-3p  | 5%  | 0.85 | 0.46 | 27.91 | 0.44 |
| hsa-miR-337-5p   | 5%  | 0.53 | 1.78 | 27.59 | 1.87 |
| hsa-miR-338-5P   | 5%  | 0.88 | 0.39 | 27.94 | 0.28 |
| hsa-miR-34b-5    | 5%  | 0.83 | 0.70 | 27.89 | 0.54 |
| hsa-miR-380-5    | 5%  | 0.77 | 0.70 | 27.83 | 0.78 |
| hsa-miR-450a-5p  | 5%  | 0.86 | 0.45 | 27.92 | 0.41 |
| hsa-miR-622      | 5%  | 0.87 | 0.40 | 27.93 | 0.31 |
| hsa-miR-7-5p     | 5%  | 0.88 | 0.42 | 27.94 | 0.25 |

|                   |    |      |      |       |      |
|-------------------|----|------|------|-------|------|
| hsa-let-7f-5p     | 4% | 0.68 | 1.29 | 27.74 | 1.30 |
| hsa-miR-125b-1-3p | 4% | 0.85 | 0.51 | 27.91 | 0.47 |
| hsa-miR-197-3p    | 4% | 0.66 | 1.40 | 27.72 | 1.38 |
| hsa-miR-199b-5p   | 4% | 0.85 | 0.55 | 27.91 | 0.54 |
| hsa-miR-340-5p    | 4% | 0.88 | 0.37 | 27.94 | 0.28 |
| hsa-miR-452-5p    | 4% | 0.85 | 0.47 | 27.91 | 0.48 |
| hsa-miR-502-3p    | 4% | 0.86 | 0.41 | 27.92 | 0.41 |
| hsa-miR-659-3     | 4% | 0.78 | 0.88 | 27.84 | 0.80 |
| hsa-miR-125b-2-3  | 3% | 0.80 | 0.73 | 27.86 | 0.79 |
| hsa-miR-181c-5p   | 3% | 0.90 | 0.36 | 27.96 | 0.24 |
| hsa-miR-190b      | 3% | 0.89 | 0.39 | 27.95 | 0.30 |
| hsa-miR-302a-3p   | 3% | 0.61 | 1.93 | 27.67 | 1.90 |
| hsa-miR-30d-3p    | 3% | 0.90 | 0.37 | 27.96 | 0.21 |
| hsa-miR-329-3p    | 3% | 0.88 | 0.42 | 27.95 | 0.31 |
| hsa-miR-605-5p    | 3% | 0.89 | 0.45 | 27.95 | 0.30 |
| hsa-miR-624-5     | 3% | 0.89 | 0.40 | 27.95 | 0.28 |
| hsa-miR-63        | 3% | 0.76 | 1.12 | 27.82 | 1.07 |
| hsa-miR-671-3p    | 3% | 0.89 | 0.42 | 27.95 | 0.31 |
| hsa-let-7b-5p     | 2% | 0.78 | 1.11 | 27.84 | 1.05 |
| hsa-miR-16-1-3p   | 2% | 0.91 | 0.42 | 27.97 | 0.19 |
| hsa-miR-222-5     | 2% | 0.87 | 0.49 | 27.93 | 0.47 |
| hsa-miR-301b-3p   | 2% | 0.91 | 0.41 | 27.97 | 0.20 |
| hsa-miR-376b-3p   | 2% | 0.90 | 0.39 | 27.96 | 0.24 |
| hsa-miR-378a-5p   | 2% | 0.90 | 0.38 | 27.96 | 0.27 |
| hsa-miR-485-3p    | 2% | 0.86 | 0.56 | 27.92 | 0.49 |
| hsa-miR-1255b-5p  | 2% | 0.92 | 0.38 | 27.98 | 0.16 |
| hsa-miR-125a-3p   | 2% | 0.92 | 0.37 | 27.98 | 0.14 |
| hsa-miR-1260a     | 2% | 0.83 | 0.86 | 27.89 | 0.85 |
| hsa-miR-15a-3p    | 2% | 0.92 | 0.37 | 27.98 | 0.16 |
| hsa-miR-214-5p    | 2% | 0.91 | 0.39 | 27.97 | 0.26 |
| hsa-miR-215-5p    | 2% | 0.84 | 0.83 | 27.90 | 0.81 |
| hsa-miR-433-3p    | 2% | 0.90 | 0.47 | 27.96 | 0.31 |
| hsa-miR-489-3p    | 2% | 0.92 | 0.37 | 27.98 | 0.15 |
| hsa-miR-513c-5    | 2% | 0.90 | 0.44 | 27.96 | 0.31 |
| hsa-miR-523-3p    | 2% | 0.83 | 1.11 | 27.89 | 1.04 |
| hsa-miR-551b-3p   | 2% | 0.82 | 1.25 | 27.88 | 1.22 |
| hsa-miR-616-3p    | 2% | 0.91 | 0.42 | 27.98 | 0.20 |
| hsa-miR-628-5p    | 2% | 0.85 | 0.82 | 27.91 | 0.73 |
| hsa-miR-655-3p    | 2% | 0.91 | 0.38 | 27.97 | 0.22 |
| hsa-miR-9-3p      | 2% | 0.91 | 0.37 | 27.97 | 0.22 |
| hsa-miR-943       | 2% | 0.92 | 0.40 | 27.98 | 0.17 |
| hsa-miR-137       | 2% | 0.92 | 0.37 | 27.98 | 0.15 |
| hsa-miR-1201      | 1% | 0.93 | 0.40 | 27.99 | 0.14 |



|                 |    |      |      |       |      |
|-----------------|----|------|------|-------|------|
| hsa-miR-1247-5p | 1% | 0.89 | 0.57 | 27.95 | 0.54 |
| hsa-miR-1300    | 1% | 0.92 | 0.38 | 27.98 | 0.18 |
| hsa-miR-154-5p  | 1% | 0.92 | 0.43 | 27.98 | 0.24 |
| hsa-miR-183-3p  | 1% | 0.93 | 0.40 | 27.99 | 0.09 |
| hsa-miR-219a-5p | 1% | 0.93 | 0.41 | 27.99 | 0.11 |
| hsa-miR-302b-3p | 1% | 0.93 | 0.40 | 27.99 | 0.12 |
| hsa-miR-302c-3p | 1% | 0.92 | 0.39 | 27.98 | 0.17 |
| hsa-miR-302c-5p | 1% | 0.92 | 0.42 | 27.98 | 0.17 |
| hsa-miR-331-5p  | 1% | 0.92 | 0.40 | 27.98 | 0.22 |
| hsa-miR-363-3p  | 1% | 0.89 | 0.58 | 27.95 | 0.56 |
| hsa-miR-409-5p  | 1% | 0.93 | 0.38 | 27.99 | 0.09 |
| hsa-miR-455-3p  | 1% | 0.90 | 0.52 | 27.96 | 0.47 |
| hsa-miR-486-3p  | 1% | 0.93 | 0.37 | 27.99 | 0.12 |
| hsa-miR-501-3p  | 1% | 0.93 | 0.39 | 27.99 | 0.16 |
| hsa-miR-509-3-5 | 1% | 0.92 | 0.44 | 27.98 | 0.21 |
| hsa-miR-518d-3p | 1% | 0.92 | 0.45 | 27.98 | 0.22 |
| hsa-miR-518d-5p | 1% | 0.93 | 0.40 | 27.99 | 0.12 |
| hsa-miR-520d-3p | 1% | 0.92 | 0.42 | 27.98 | 0.22 |
| hsa-miR-520f-3p | 1% | 0.93 | 0.39 | 27.99 | 0.11 |
| hsa-miR-548a-3p | 1% | 0.93 | 0.38 | 27.99 | 0.11 |
| hsa-miR-614     | 1% | 0.93 | 0.39 | 27.99 | 0.11 |
| hsa-miR-873-5p  | 1% | 0.93 | 0.37 | 27.99 | 0.11 |
| hsa-miR-874-3p  | 1% | 0.91 | 0.40 | 27.98 | 0.28 |
| hsa-miR-890     | 1% | 0.92 | 0.40 | 27.99 | 0.16 |
| hsa-let-7a-3    | 0% | 0.94 | 0.38 | 28.00 | 0.00 |
| hsa-let-7b-3p   | 0% | 0.94 | 0.38 | 28.00 | 0.00 |
| hsa-let-7c#     | 0% | 0.94 | 0.38 | 28.00 | 0.00 |
| hsa-let-7e-3p   | 0% | 0.94 | 0.38 | 28.00 | 0.00 |
| hsa-let-7f-1-3p | 0% | 0.94 | 0.38 | 28.00 | 0.00 |
| hsa-let-7f-2-3p | 0% | 0.94 | 0.38 | 28.00 | 0.00 |
| hsa-let-7g-3p   | 0% | 0.94 | 0.38 | 28.00 | 0.00 |
| hsa-let-7i-3p   | 0% | 0.94 | 0.38 | 28.00 | 0.00 |
| hsa-miR-1-3p    | 0% | 0.94 | 0.38 | 28.00 | 0.00 |
| hsa-miR-100-3   | 0% | 0.94 | 0.38 | 28.00 | 0.00 |
| hsa-miR-101-5   | 0% | 0.94 | 0.38 | 28.00 | 0.00 |
| hsa-miR-105-3p  | 0% | 0.94 | 0.38 | 28.00 | 0.00 |
| hsa-miR-105-5p  | 0% | 0.94 | 0.38 | 28.00 | 0.00 |
| hsa-miR-106a-3  | 0% | 0.94 | 0.38 | 28.00 | 0.00 |
| hsa-miR-106b-3p | 0% | 0.94 | 0.38 | 28.00 | 0.00 |
| hsa-miR-10a-3p  | 0% | 0.94 | 0.38 | 28.00 | 0.00 |
| hsa-miR-1178-3p | 0% | 0.94 | 0.38 | 28.00 | 0.00 |
| hsa-miR-1179    | 0% | 0.94 | 0.38 | 28.00 | 0.00 |
| hsa-miR-1182    | 0% | 0.94 | 0.38 | 28.00 | 0.00 |

|                 |    |      |      |       |      |
|-----------------|----|------|------|-------|------|
| hsa-miR-1183    | 0% | 0.94 | 0.38 | 28.00 | 0.00 |
| hsa-miR-1184    | 0% | 0.94 | 0.38 | 28.00 | 0.00 |
| hsa-miR-1197    | 0% | 0.94 | 0.38 | 28.00 | 0.00 |
| hsa-miR-1200    | 0% | 0.94 | 0.38 | 28.00 | 0.00 |
| hsa-miR-1203    | 0% | 0.94 | 0.38 | 28.00 | 0.00 |
| hsa-miR-1204    | 0% | 0.94 | 0.38 | 28.00 | 0.00 |
| hsa-miR-1205    | 0% | 0.94 | 0.38 | 28.00 | 0.00 |
| hsa-miR-1206    | 0% | 0.94 | 0.38 | 28.00 | 0.00 |
| hsa-miR-1208    | 0% | 0.94 | 0.38 | 28.00 | 0.00 |
| hsa-miR-122-3p  | 0% | 0.94 | 0.38 | 28.00 | 0.00 |
| hsa-miR-1224-3p | 0% | 0.94 | 0.38 | 28.00 | 0.00 |
| hsa-miR-1225-3p | 0% | 0.94 | 0.38 | 28.00 | 0.00 |
| hsa-miR-1228-5  | 0% | 0.94 | 0.38 | 28.00 | 0.00 |
| hsa-miR-1233-3p | 0% | 0.94 | 0.38 | 28.00 | 0.00 |
| hsa-miR-1236-3p | 0% | 0.94 | 0.38 | 28.00 | 0.00 |
| hsa-miR-1238-3  | 0% | 0.94 | 0.38 | 28.00 | 0.00 |
| hsa-miR-124     | 0% | 0.94 | 0.38 | 28.00 | 0.00 |
| hsa-miR-1243    | 0% | 0.94 | 0.38 | 28.00 | 0.00 |
| hsa-miR-1245a   | 0% | 0.94 | 0.38 | 28.00 | 0.00 |
| hsa-miR-1248    | 0% | 0.94 | 0.38 | 28.00 | 0.00 |
| hsa-miR-1249-3p | 0% | 0.94 | 0.38 | 28.00 | 0.00 |
| hsa-miR-1250-5p | 0% | 0.94 | 0.38 | 28.00 | 0.00 |
| hsa-miR-1251-5p | 0% | 0.94 | 0.38 | 28.00 | 0.00 |
| hsa-miR-1252-5  | 0% | 0.94 | 0.38 | 28.00 | 0.00 |
| hsa-miR-1253    | 0% | 0.94 | 0.38 | 28.00 | 0.00 |
| hsa-miR-1254    | 0% | 0.94 | 0.38 | 28.00 | 0.00 |
| hsa-miR-1255    | 0% | 0.94 | 0.38 | 28.00 | 0.00 |
| hsa-miR-1256    | 0% | 0.94 | 0.38 | 28.00 | 0.00 |
| hsa-miR-1257    | 0% | 0.94 | 0.38 | 28.00 | 0.00 |
| hsa-miR-1259    | 0% | 0.94 | 0.38 | 28.00 | 0.00 |
| hsa-miR-1262    | 0% | 0.94 | 0.38 | 28.00 | 0.00 |
| hsa-miR-1263    | 0% | 0.94 | 0.38 | 28.00 | 0.00 |
| hsa-miR-1264    | 0% | 0.94 | 0.38 | 28.00 | 0.00 |
| hsa-miR-1265    | 0% | 0.94 | 0.38 | 28.00 | 0.00 |
| hsa-miR-1267    | 0% | 0.94 | 0.38 | 28.00 | 0.00 |
| hsa-miR-1269    | 0% | 0.94 | 0.38 | 28.00 | 0.00 |
| hsa-miR-127     | 0% | 0.94 | 0.38 | 28.00 | 0.00 |
| hsa-miR-1270    | 0% | 0.94 | 0.38 | 28.00 | 0.00 |
| hsa-miR-1272    | 0% | 0.94 | 0.38 | 28.00 | 0.00 |
| hsa-miR-1275    | 0% | 0.94 | 0.38 | 28.00 | 0.00 |
| hsa-miR-1276    | 0% | 0.94 | 0.38 | 28.00 | 0.00 |
| hsa-miR-1282    | 0% | 0.94 | 0.38 | 28.00 | 0.00 |
| hsa-miR-1283    | 0% | 0.94 | 0.38 | 28.00 | 0.00 |

|                  |    |      |      |       |      |
|------------------|----|------|------|-------|------|
| hsa-miR-1284     | 0% | 0.94 | 0.38 | 28.00 | 0.00 |
| hsa-miR-1285-3p  | 0% | 0.94 | 0.38 | 28.00 | 0.00 |
| hsa-miR-1286     | 0% | 0.94 | 0.38 | 28.00 | 0.00 |
| hsa-miR-1288-3p  | 0% | 0.94 | 0.38 | 28.00 | 0.00 |
| hsa-miR-1289     | 0% | 0.94 | 0.38 | 28.00 | 0.00 |
| hsa-miR-129-1-3p | 0% | 0.94 | 0.38 | 28.00 | 0.00 |
| hsa-miR-129-2-3p | 0% | 0.94 | 0.38 | 28.00 | 0.00 |
| hsa-miR-129-5p   | 0% | 0.94 | 0.38 | 28.00 | 0.00 |
| hsa-miR-1292-5p  | 0% | 0.94 | 0.38 | 28.00 | 0.00 |
| hsa-miR-1293     | 0% | 0.94 | 0.38 | 28.00 | 0.00 |
| hsa-miR-1294     | 0% | 0.94 | 0.38 | 28.00 | 0.00 |
| hsa-miR-1296-5p  | 0% | 0.94 | 0.38 | 28.00 | 0.00 |
| hsa-miR-1298-5p  | 0% | 0.94 | 0.38 | 28.00 | 0.00 |
| hsa-miR-130      | 0% | 0.94 | 0.38 | 28.00 | 0.00 |
| hsa-miR-1301-3p  | 0% | 0.94 | 0.38 | 28.00 | 0.00 |
| hsa-miR-1304-5   | 0% | 0.94 | 0.38 | 28.00 | 0.00 |
| hsa-miR-1305     | 0% | 0.94 | 0.38 | 28.00 | 0.00 |
| hsa-miR-130a-5   | 0% | 0.94 | 0.38 | 28.00 | 0.00 |
| hsa-miR-130b-5   | 0% | 0.94 | 0.38 | 28.00 | 0.00 |
| hsa-miR-132-5p   | 0% | 0.94 | 0.38 | 28.00 | 0.00 |
| hsa-miR-1324     | 0% | 0.94 | 0.38 | 28.00 | 0.00 |
| hsa-miR-133b     | 0% | 0.94 | 0.38 | 28.00 | 0.00 |
| hsa-miR-135b-3p  | 0% | 0.94 | 0.38 | 28.00 | 0.00 |
| hsa-miR-136-5p   | 0% | 0.94 | 0.38 | 28.00 | 0.00 |
| hsa-miR-138-2-3  | 0% | 0.94 | 0.38 | 28.00 | 0.00 |
| hsa-miR-138-5p   | 0% | 0.94 | 0.38 | 28.00 | 0.00 |
| hsa-miR-139-3p   | 0% | 0.94 | 0.38 | 28.00 | 0.00 |
| hsa-miR-141-5    | 0% | 0.94 | 0.38 | 28.00 | 0.00 |
| hsa-miR-142-5p   | 0% | 0.94 | 0.38 | 28.00 | 0.00 |
| hsa-miR-143-5p   | 0% | 0.94 | 0.38 | 28.00 | 0.00 |
| hsa-miR-144-3p   | 0% | 0.94 | 0.38 | 28.00 | 0.00 |
| hsa-miR-145-3p   | 0% | 0.94 | 0.38 | 28.00 | 0.00 |
| hsa-miR-146a-3   | 0% | 0.94 | 0.38 | 28.00 | 0.00 |
| hsa-miR-147a     | 0% | 0.94 | 0.38 | 28.00 | 0.00 |
| hsa-miR-147b     | 0% | 0.94 | 0.38 | 28.00 | 0.00 |
| hsa-miR-148a-5p  | 0% | 0.94 | 0.38 | 28.00 | 0.00 |
| hsa-miR-148b-5   | 0% | 0.94 | 0.38 | 28.00 | 0.00 |
| hsa-miR-149-3    | 0% | 0.94 | 0.38 | 28.00 | 0.00 |
| hsa-miR-155      | 0% | 0.94 | 0.38 | 28.00 | 0.00 |
| hsa-miR-155-3    | 0% | 0.94 | 0.38 | 28.00 | 0.00 |
| hsa-miR-15b-3p   | 0% | 0.94 | 0.38 | 28.00 | 0.00 |
| hsa-miR-16-2-3p  | 0% | 0.94 | 0.38 | 28.00 | 0.00 |
| hsa-miR-17-3p    | 0% | 0.94 | 0.38 | 28.00 | 0.00 |

|                   |    |      |      |       |      |
|-------------------|----|------|------|-------|------|
| hsa-miR-181a-3p   | 0% | 0.94 | 0.38 | 28.00 | 0.00 |
| hsa-miR-181c-3    | 0% | 0.94 | 0.38 | 28.00 | 0.00 |
| hsa-miR-182-3p    | 0% | 0.94 | 0.38 | 28.00 | 0.00 |
| hsa-miR-182-5p    | 0% | 0.94 | 0.38 | 28.00 | 0.00 |
| hsa-miR-183-5p    | 0% | 0.94 | 0.38 | 28.00 | 0.00 |
| hsa-miR-185-3     | 0% | 0.94 | 0.38 | 28.00 | 0.00 |
| hsa-miR-186-3     | 0% | 0.94 | 0.38 | 28.00 | 0.00 |
| hsa-miR-188-3p    | 0% | 0.94 | 0.38 | 28.00 | 0.00 |
| hsa-miR-18a-3     | 0% | 0.94 | 0.38 | 28.00 | 0.00 |
| hsa-miR-18b-3     | 0% | 0.94 | 0.38 | 28.00 | 0.00 |
| hsa-miR-18b-5p    | 0% | 0.94 | 0.38 | 28.00 | 0.00 |
| hsa-miR-191-3p    | 0% | 0.94 | 0.38 | 28.00 | 0.00 |
| hsa-miR-192-3p    | 0% | 0.94 | 0.38 | 28.00 | 0.00 |
| hsa-miR-193a-3p   | 0% | 0.94 | 0.38 | 28.00 | 0.00 |
| hsa-miR-194-3p    | 0% | 0.94 | 0.38 | 28.00 | 0.00 |
| hsa-miR-195-3p    | 0% | 0.94 | 0.38 | 28.00 | 0.00 |
| hsa-miR-196a-3    | 0% | 0.94 | 0.38 | 28.00 | 0.00 |
| hsa-miR-196b-5p   | 0% | 0.94 | 0.38 | 28.00 | 0.00 |
| hsa-miR-198       | 0% | 0.94 | 0.38 | 28.00 | 0.00 |
| hsa-miR-19a-5     | 0% | 0.94 | 0.38 | 28.00 | 0.00 |
| hsa-miR-19b-1-5p  | 0% | 0.94 | 0.38 | 28.00 | 0.00 |
| hsa-miR-200a-5p   | 0% | 0.94 | 0.38 | 28.00 | 0.00 |
| hsa-miR-200b-5p   | 0% | 0.94 | 0.38 | 28.00 | 0.00 |
| hsa-miR-200c-5p   | 0% | 0.94 | 0.38 | 28.00 | 0.00 |
| hsa-miR-208a-3p   | 0% | 0.94 | 0.38 | 28.00 | 0.00 |
| hsa-miR-208b-3p   | 0% | 0.94 | 0.38 | 28.00 | 0.00 |
| hsa-miR-20b-3     | 0% | 0.94 | 0.38 | 28.00 | 0.00 |
| hsa-miR-21-3      | 0% | 0.94 | 0.38 | 28.00 | 0.00 |
| hsa-miR-211-5p    | 0% | 0.94 | 0.38 | 28.00 | 0.00 |
| hsa-miR-213       | 0% | 0.94 | 0.38 | 28.00 | 0.00 |
| hsa-miR-216a-5p   | 0% | 0.94 | 0.38 | 28.00 | 0.00 |
| hsa-miR-216b-5p   | 0% | 0.94 | 0.38 | 28.00 | 0.00 |
| hsa-miR-217       | 0% | 0.94 | 0.38 | 28.00 | 0.00 |
| hsa-miR-218-1-3   | 0% | 0.94 | 0.38 | 28.00 | 0.00 |
| hsa-miR-218-2-3p  | 0% | 0.94 | 0.38 | 28.00 | 0.00 |
| hsa-miR-219a-1-3p | 0% | 0.94 | 0.38 | 28.00 | 0.00 |
| hsa-miR-219a-2-3p | 0% | 0.94 | 0.38 | 28.00 | 0.00 |
| hsa-miR-22-3p     | 0% | 0.94 | 0.38 | 28.00 | 0.00 |
| hsa-miR-220       | 0% | 0.94 | 0.38 | 28.00 | 0.00 |
| hsa-miR-220b      | 0% | 0.94 | 0.38 | 28.00 | 0.00 |
| hsa-miR-220c      | 0% | 0.94 | 0.38 | 28.00 | 0.00 |
| hsa-miR-221-5p    | 0% | 0.94 | 0.38 | 28.00 | 0.00 |
| hsa-miR-23a-3p    | 0% | 0.94 | 0.38 | 28.00 | 0.00 |

|                  |    |      |      |       |      |
|------------------|----|------|------|-------|------|
| hsa-miR-23a-5p   | 0% | 0.94 | 0.38 | 28.00 | 0.00 |
| hsa-miR-23b-3p   | 0% | 0.94 | 0.38 | 28.00 | 0.00 |
| hsa-miR-23b-5p   | 0% | 0.94 | 0.38 | 28.00 | 0.00 |
| hsa-miR-24-1-5   | 0% | 0.94 | 0.38 | 28.00 | 0.00 |
| hsa-miR-24-2-5   | 0% | 0.94 | 0.38 | 28.00 | 0.00 |
| hsa-miR-25-5     | 0% | 0.94 | 0.38 | 28.00 | 0.00 |
| hsa-miR-26a-1-3p | 0% | 0.94 | 0.38 | 28.00 | 0.00 |
| hsa-miR-26a-2-3p | 0% | 0.94 | 0.38 | 28.00 | 0.00 |
| hsa-miR-26b-3p   | 0% | 0.94 | 0.38 | 28.00 | 0.00 |
| hsa-miR-296-3p   | 0% | 0.94 | 0.38 | 28.00 | 0.00 |
| hsa-miR-298      | 0% | 0.94 | 0.38 | 28.00 | 0.00 |
| hsa-miR-299-3    | 0% | 0.94 | 0.38 | 28.00 | 0.00 |
| hsa-miR-299-5p   | 0% | 0.94 | 0.38 | 28.00 | 0.00 |
| hsa-miR-29b-1-5p | 0% | 0.94 | 0.38 | 28.00 | 0.00 |
| hsa-miR-29b-2-5p | 0% | 0.94 | 0.38 | 28.00 | 0.00 |
| hsa-miR-302a-5p  | 0% | 0.94 | 0.38 | 28.00 | 0.00 |
| hsa-miR-302b-5   | 0% | 0.94 | 0.38 | 28.00 | 0.00 |
| hsa-miR-302d-3p  | 0% | 0.94 | 0.38 | 28.00 | 0.00 |
| hsa-miR-302d-5p  | 0% | 0.94 | 0.38 | 28.00 | 0.00 |
| hsa-miR-30b-3p   | 0% | 0.94 | 0.38 | 28.00 | 0.00 |
| hsa-miR-30c-1-3p | 0% | 0.94 | 0.38 | 28.00 | 0.00 |
| hsa-miR-30c-2-3p | 0% | 0.94 | 0.38 | 28.00 | 0.00 |
| hsa-miR-32-3p    | 0% | 0.94 | 0.38 | 28.00 | 0.00 |
| hsa-miR-32-5p    | 0% | 0.94 | 0.38 | 28.00 | 0.00 |
| hsa-miR-325      | 0% | 0.94 | 0.38 | 28.00 | 0.00 |
| hsa-miR-326      | 0% | 0.94 | 0.38 | 28.00 | 0.00 |
| hsa-miR-330-5p   | 0% | 0.94 | 0.38 | 28.00 | 0.00 |
| hsa-miR-335-3p   | 0% | 0.94 | 0.38 | 28.00 | 0.00 |
| hsa-miR-337-3p   | 0% | 0.94 | 0.38 | 28.00 | 0.00 |
| hsa-miR-338-3p   | 0% | 0.94 | 0.38 | 28.00 | 0.00 |
| hsa-miR-33a-3p   | 0% | 0.94 | 0.38 | 28.00 | 0.00 |
| hsa-miR-33a-5p   | 0% | 0.94 | 0.38 | 28.00 | 0.00 |
| hsa-miR-33b-5p   | 0% | 0.94 | 0.38 | 28.00 | 0.00 |
| hsa-miR-342-5p   | 0% | 0.94 | 0.38 | 28.00 | 0.00 |
| hsa-miR-346      | 0% | 0.94 | 0.38 | 28.00 | 0.00 |
| hsa-miR-361-3p   | 0% | 0.94 | 0.38 | 28.00 | 0.00 |
| hsa-miR-362-3p   | 0% | 0.94 | 0.38 | 28.00 | 0.00 |
| hsa-miR-363-5p   | 0% | 0.94 | 0.38 | 28.00 | 0.00 |
| hsa-miR-367-3p   | 0% | 0.94 | 0.38 | 28.00 | 0.00 |
| hsa-miR-367-5p   | 0% | 0.94 | 0.38 | 28.00 | 0.00 |
| hsa-miR-369-5p   | 0% | 0.94 | 0.38 | 28.00 | 0.00 |
| hsa-miR-371a-3p  | 0% | 0.94 | 0.38 | 28.00 | 0.00 |
| hsa-miR-374a-3p  | 0% | 0.94 | 0.38 | 28.00 | 0.00 |

|                 |    |      |      |       |      |
|-----------------|----|------|------|-------|------|
| hsa-miR-374b-3  | 0% | 0.94 | 0.38 | 28.00 | 0.00 |
| hsa-miR-376a-5  | 0% | 0.94 | 0.38 | 28.00 | 0.00 |
| hsa-miR-377-3p  | 0% | 0.94 | 0.38 | 28.00 | 0.00 |
| hsa-miR-377-5p  | 0% | 0.94 | 0.38 | 28.00 | 0.00 |
| hsa-miR-380-3p  | 0% | 0.94 | 0.38 | 28.00 | 0.00 |
| hsa-miR-384     | 0% | 0.94 | 0.38 | 28.00 | 0.00 |
| hsa-miR-411-3p  | 0% | 0.94 | 0.38 | 28.00 | 0.00 |
| hsa-miR-412-3p  | 0% | 0.94 | 0.38 | 28.00 | 0.00 |
| hsa-miR-422a    | 0% | 0.94 | 0.38 | 28.00 | 0.00 |
| hsa-miR-425-5p  | 0% | 0.94 | 0.38 | 28.00 | 0.00 |
| hsa-miR-431-3p  | 0% | 0.94 | 0.38 | 28.00 | 0.00 |
| hsa-miR-431-5p  | 0% | 0.94 | 0.38 | 28.00 | 0.00 |
| hsa-miR-432-3   | 0% | 0.94 | 0.38 | 28.00 | 0.00 |
| hsa-miR-448     | 0% | 0.94 | 0.38 | 28.00 | 0.00 |
| hsa-miR-450b-3p | 0% | 0.94 | 0.38 | 28.00 | 0.00 |
| hsa-miR-450b-5p | 0% | 0.94 | 0.38 | 28.00 | 0.00 |
| hsa-miR-452-3   | 0% | 0.94 | 0.38 | 28.00 | 0.00 |
| hsa-miR-453     | 0% | 0.94 | 0.38 | 28.00 | 0.00 |
| hsa-miR-454-5   | 0% | 0.94 | 0.38 | 28.00 | 0.00 |
| hsa-miR-485-5p  | 0% | 0.94 | 0.38 | 28.00 | 0.00 |
| hsa-miR-486-5p  | 0% | 0.94 | 0.38 | 28.00 | 0.00 |
| hsa-miR-487a-3p | 0% | 0.94 | 0.38 | 28.00 | 0.00 |
| hsa-miR-488-3p  | 0% | 0.94 | 0.38 | 28.00 | 0.00 |
| hsa-miR-490-3p  | 0% | 0.94 | 0.38 | 28.00 | 0.00 |
| hsa-miR-491-3p  | 0% | 0.94 | 0.38 | 28.00 | 0.00 |
| hsa-miR-492     | 0% | 0.94 | 0.38 | 28.00 | 0.00 |
| hsa-miR-493-3p  | 0% | 0.94 | 0.38 | 28.00 | 0.00 |
| hsa-miR-497     | 0% | 0.94 | 0.38 | 28.00 | 0.00 |
| hsa-miR-497-3p  | 0% | 0.94 | 0.38 | 28.00 | 0.00 |
| hsa-miR-499a-3p | 0% | 0.94 | 0.38 | 28.00 | 0.00 |
| hsa-miR-501-5p  | 0% | 0.94 | 0.38 | 28.00 | 0.00 |
| hsa-miR-504-5p  | 0% | 0.94 | 0.38 | 28.00 | 0.00 |
| hsa-miR-505-5   | 0% | 0.94 | 0.38 | 28.00 | 0.00 |
| hsa-miR-507     | 0% | 0.94 | 0.38 | 28.00 | 0.00 |
| hsa-miR-508-5   | 0% | 0.94 | 0.38 | 28.00 | 0.00 |
| hsa-miR-511-5p  | 0% | 0.94 | 0.38 | 28.00 | 0.00 |
| hsa-miR-512-3p  | 0% | 0.94 | 0.38 | 28.00 | 0.00 |
| hsa-miR-512-5   | 0% | 0.94 | 0.38 | 28.00 | 0.00 |
| hsa-miR-513a-5p | 0% | 0.94 | 0.38 | 28.00 | 0.00 |
| hsa-miR-513b-5p | 0% | 0.94 | 0.38 | 28.00 | 0.00 |
| hsa-miR-515-3p  | 0% | 0.94 | 0.38 | 28.00 | 0.00 |
| hsa-miR-515-5p  | 0% | 0.94 | 0.38 | 28.00 | 0.00 |
| hsa-miR-516-3p  | 0% | 0.94 | 0.38 | 28.00 | 0.00 |

|                 |    |      |      |       |      |
|-----------------|----|------|------|-------|------|
| hsa-miR-516a-5p | 0% | 0.94 | 0.38 | 28.00 | 0.00 |
| hsa-miR-516b-5p | 0% | 0.94 | 0.38 | 28.00 | 0.00 |
| hsa-miR-517-5p  | 0% | 0.94 | 0.38 | 28.00 | 0.00 |
| hsa-miR-517a-3p | 0% | 0.94 | 0.38 | 28.00 | 0.00 |
| hsa-miR-517b-3p | 0% | 0.94 | 0.38 | 28.00 | 0.00 |
| hsa-miR-517c-3p | 0% | 0.94 | 0.38 | 28.00 | 0.00 |
| hsa-miR-518a-3p | 0% | 0.94 | 0.38 | 28.00 | 0.00 |
| hsa-miR-518a-5p | 0% | 0.94 | 0.38 | 28.00 | 0.00 |
| hsa-miR-518b    | 0% | 0.94 | 0.38 | 28.00 | 0.00 |
| hsa-miR-518c-3p | 0% | 0.94 | 0.38 | 28.00 | 0.00 |
| hsa-miR-518c-5  | 0% | 0.94 | 0.38 | 28.00 | 0.00 |
| hsa-miR-518e-3p | 0% | 0.94 | 0.38 | 28.00 | 0.00 |
| hsa-miR-518e-5p | 0% | 0.94 | 0.38 | 28.00 | 0.00 |
| hsa-miR-518f-3p | 0% | 0.94 | 0.38 | 28.00 | 0.00 |
| hsa-miR-518f-5  | 0% | 0.94 | 0.38 | 28.00 | 0.00 |
| hsa-miR-519a-3p | 0% | 0.94 | 0.38 | 28.00 | 0.00 |
| hsa-miR-519b-3p | 0% | 0.94 | 0.38 | 28.00 | 0.00 |
| hsa-miR-519c-3p | 0% | 0.94 | 0.38 | 28.00 | 0.00 |
| hsa-miR-519d-3p | 0% | 0.94 | 0.38 | 28.00 | 0.00 |
| hsa-miR-519e-3p | 0% | 0.94 | 0.38 | 28.00 | 0.00 |
| hsa-miR-519e-5  | 0% | 0.94 | 0.38 | 28.00 | 0.00 |
| hsa-miR-520a-3p | 0% | 0.94 | 0.38 | 28.00 | 0.00 |
| hsa-miR-520a-5p | 0% | 0.94 | 0.38 | 28.00 | 0.00 |
| hsa-miR-520d-5p | 0% | 0.94 | 0.38 | 28.00 | 0.00 |
| hsa-miR-520g-3p | 0% | 0.94 | 0.38 | 28.00 | 0.00 |
| hsa-miR-520h    | 0% | 0.94 | 0.38 | 28.00 | 0.00 |
| hsa-miR-521     | 0% | 0.94 | 0.38 | 28.00 | 0.00 |
| hsa-miR-522-3p  | 0% | 0.94 | 0.38 | 28.00 | 0.00 |
| hsa-miR-524-3p  | 0% | 0.94 | 0.38 | 28.00 | 0.00 |
| hsa-miR-524-5p  | 0% | 0.94 | 0.38 | 28.00 | 0.00 |
| hsa-miR-525-5p  | 0% | 0.94 | 0.38 | 28.00 | 0.00 |
| hsa-miR-525-3p  | 0% | 0.94 | 0.38 | 28.00 | 0.00 |
| hsa-miR-526b-5p | 0% | 0.94 | 0.38 | 28.00 | 0.00 |
| hsa-miR-541-3   | 0% | 0.94 | 0.38 | 28.00 | 0.00 |
| hsa-miR-541-5p  | 0% | 0.94 | 0.38 | 28.00 | 0.00 |
| hsa-miR-542-5p  | 0% | 0.94 | 0.38 | 28.00 | 0.00 |
| hsa-miR-544a    | 0% | 0.94 | 0.38 | 28.00 | 0.00 |
| hsa-miR-545-3p  | 0% | 0.94 | 0.38 | 28.00 | 0.00 |
| hsa-miR-545-5   | 0% | 0.94 | 0.38 | 28.00 | 0.00 |
| hsa-miR-548a-5  | 0% | 0.94 | 0.38 | 28.00 | 0.00 |
| hsa-miR-548b-3p | 0% | 0.94 | 0.38 | 28.00 | 0.00 |
| hsa-miR-548c-3p | 0% | 0.94 | 0.38 | 28.00 | 0.00 |
| hsa-miR-548d-3  | 0% | 0.94 | 0.38 | 28.00 | 0.00 |

|                 |    |      |      |       |      |
|-----------------|----|------|------|-------|------|
| hsa-miR-548e-3  | 0% | 0.94 | 0.38 | 28.00 | 0.00 |
| hsa-miR-548g-3  | 0% | 0.94 | 0.38 | 28.00 | 0.00 |
| hsa-miR-548h-5p | 0% | 0.94 | 0.38 | 28.00 | 0.00 |
| hsa-miR-548i    | 0% | 0.94 | 0.38 | 28.00 | 0.00 |
| hsa-miR-548j-5  | 0% | 0.94 | 0.38 | 28.00 | 0.00 |
| hsa-miR-548k    | 0% | 0.94 | 0.38 | 28.00 | 0.00 |
| hsa-miR-548l    | 0% | 0.94 | 0.38 | 28.00 | 0.00 |
| hsa-miR-548m    | 0% | 0.94 | 0.38 | 28.00 | 0.00 |
| hsa-miR-548n    | 0% | 0.94 | 0.38 | 28.00 | 0.00 |
| hsa-miR-548p    | 0% | 0.94 | 0.38 | 28.00 | 0.00 |
| hsa-miR-549a    | 0% | 0.94 | 0.38 | 28.00 | 0.00 |
| hsa-miR-550a-3  | 0% | 0.94 | 0.38 | 28.00 | 0.00 |
| hsa-miR-550a-5p | 0% | 0.94 | 0.38 | 28.00 | 0.00 |
| hsa-miR-551a    | 0% | 0.94 | 0.38 | 28.00 | 0.00 |
| hsa-miR-551b-5  | 0% | 0.94 | 0.38 | 28.00 | 0.00 |
| hsa-miR-552-3p  | 0% | 0.94 | 0.38 | 28.00 | 0.00 |
| hsa-miR-553     | 0% | 0.94 | 0.38 | 28.00 | 0.00 |
| hsa-miR-554     | 0% | 0.94 | 0.38 | 28.00 | 0.00 |
| hsa-miR-555     | 0% | 0.94 | 0.38 | 28.00 | 0.00 |
| hsa-miR-556-3p  | 0% | 0.94 | 0.38 | 28.00 | 0.00 |
| hsa-miR-556-5p  | 0% | 0.94 | 0.38 | 28.00 | 0.00 |
| hsa-miR-557     | 0% | 0.94 | 0.38 | 28.00 | 0.00 |
| hsa-miR-558     | 0% | 0.94 | 0.38 | 28.00 | 0.00 |
| hsa-miR-559     | 0% | 0.94 | 0.38 | 28.00 | 0.00 |
| hsa-miR-561-3   | 0% | 0.94 | 0.38 | 28.00 | 0.00 |
| hsa-miR-562     | 0% | 0.94 | 0.38 | 28.00 | 0.00 |
| hsa-miR-563     | 0% | 0.94 | 0.38 | 28.00 | 0.00 |
| hsa-miR-564     | 0% | 0.94 | 0.38 | 28.00 | 0.00 |
| hsa-miR-566     | 0% | 0.94 | 0.38 | 28.00 | 0.00 |
| hsa-miR-567     | 0% | 0.94 | 0.38 | 28.00 | 0.00 |
| hsa-miR-569     | 0% | 0.94 | 0.38 | 28.00 | 0.00 |
| hsa-miR-570-3   | 0% | 0.94 | 0.38 | 28.00 | 0.00 |
| hsa-miR-571     | 0% | 0.94 | 0.38 | 28.00 | 0.00 |
| hsa-miR-573     | 0% | 0.94 | 0.38 | 28.00 | 0.00 |
| hsa-miR-575     | 0% | 0.94 | 0.38 | 28.00 | 0.00 |
| hsa-miR-576-5   | 0% | 0.94 | 0.38 | 28.00 | 0.00 |
| hsa-miR-577     | 0% | 0.94 | 0.38 | 28.00 | 0.00 |
| hsa-miR-578     | 0% | 0.94 | 0.38 | 28.00 | 0.00 |
| hsa-miR-579-3p  | 0% | 0.94 | 0.38 | 28.00 | 0.00 |
| hsa-miR-580-3p  | 0% | 0.94 | 0.38 | 28.00 | 0.00 |
| hsa-miR-581     | 0% | 0.94 | 0.38 | 28.00 | 0.00 |
| hsa-miR-582-3p  | 0% | 0.94 | 0.38 | 28.00 | 0.00 |
| hsa-miR-582-5p  | 0% | 0.94 | 0.38 | 28.00 | 0.00 |



|                |    |      |      |       |      |
|----------------|----|------|------|-------|------|
| hsa-miR-583    | 0% | 0.94 | 0.38 | 28.00 | 0.00 |
| hsa-miR-584-5p | 0% | 0.94 | 0.38 | 28.00 | 0.00 |
| hsa-miR-585-3  | 0% | 0.94 | 0.38 | 28.00 | 0.00 |
| hsa-miR-586    | 0% | 0.94 | 0.38 | 28.00 | 0.00 |
| hsa-miR-587    | 0% | 0.94 | 0.38 | 28.00 | 0.00 |
| hsa-miR-588    | 0% | 0.94 | 0.38 | 28.00 | 0.00 |
| hsa-miR-589-3  | 0% | 0.94 | 0.38 | 28.00 | 0.00 |
| hsa-miR-589-5p | 0% | 0.94 | 0.38 | 28.00 | 0.00 |
| hsa-miR-591    | 0% | 0.94 | 0.38 | 28.00 | 0.00 |
| hsa-miR-592    | 0% | 0.94 | 0.38 | 28.00 | 0.00 |
| hsa-miR-593-3p | 0% | 0.94 | 0.38 | 28.00 | 0.00 |
| hsa-miR-593-5  | 0% | 0.94 | 0.38 | 28.00 | 0.00 |
| hsa-miR-595    | 0% | 0.94 | 0.38 | 28.00 | 0.00 |
| hsa-miR-596    | 0% | 0.94 | 0.38 | 28.00 | 0.00 |
| hsa-miR-599    | 0% | 0.94 | 0.38 | 28.00 | 0.00 |
| hsa-miR-600    | 0% | 0.94 | 0.38 | 28.00 | 0.00 |
| hsa-miR-603    | 0% | 0.94 | 0.38 | 28.00 | 0.00 |
| hsa-miR-604    | 0% | 0.94 | 0.38 | 28.00 | 0.00 |
| hsa-miR-606    | 0% | 0.94 | 0.38 | 28.00 | 0.00 |
| hsa-miR-607    | 0% | 0.94 | 0.38 | 28.00 | 0.00 |
| hsa-miR-608    | 0% | 0.94 | 0.38 | 28.00 | 0.00 |
| hsa-miR-609    | 0% | 0.94 | 0.38 | 28.00 | 0.00 |
| hsa-miR-613    | 0% | 0.94 | 0.38 | 28.00 | 0.00 |
| hsa-miR-615-5p | 0% | 0.94 | 0.38 | 28.00 | 0.00 |
| hsa-miR-616-5  | 0% | 0.94 | 0.38 | 28.00 | 0.00 |
| hsa-miR-617    | 0% | 0.94 | 0.38 | 28.00 | 0.00 |
| hsa-miR-618    | 0% | 0.94 | 0.38 | 28.00 | 0.00 |
| hsa-miR-620    | 0% | 0.94 | 0.38 | 28.00 | 0.00 |
| hsa-miR-621    | 0% | 0.94 | 0.38 | 28.00 | 0.00 |
| hsa-miR-623    | 0% | 0.94 | 0.38 | 28.00 | 0.00 |
| hsa-miR-624-3p | 0% | 0.94 | 0.38 | 28.00 | 0.00 |
| hsa-miR-625-5  | 0% | 0.94 | 0.38 | 28.00 | 0.00 |
| hsa-miR-626    | 0% | 0.94 | 0.38 | 28.00 | 0.00 |
| hsa-miR-627-5p | 0% | 0.94 | 0.38 | 28.00 | 0.00 |
| hsa-miR-628-3p | 0% | 0.94 | 0.38 | 28.00 | 0.00 |
| hsa-miR-629-5  | 0% | 0.94 | 0.38 | 28.00 | 0.00 |
| hsa-miR-630    | 0% | 0.94 | 0.38 | 28.00 | 0.00 |
| hsa-miR-631    | 0% | 0.94 | 0.38 | 28.00 | 0.00 |
| hsa-miR-633    | 0% | 0.94 | 0.38 | 28.00 | 0.00 |
| hsa-miR-634    | 0% | 0.94 | 0.38 | 28.00 | 0.00 |
| hsa-miR-635    | 0% | 0.94 | 0.38 | 28.00 | 0.00 |
| hsa-miR-637    | 0% | 0.94 | 0.38 | 28.00 | 0.00 |
| hsa-miR-639    | 0% | 0.94 | 0.38 | 28.00 | 0.00 |

|                 |    |      |      |       |      |
|-----------------|----|------|------|-------|------|
| hsa-miR-640     | 0% | 0.94 | 0.38 | 28.00 | 0.00 |
| hsa-miR-641     | 0% | 0.94 | 0.38 | 28.00 | 0.00 |
| hsa-miR-643     | 0% | 0.94 | 0.38 | 28.00 | 0.00 |
| hsa-miR-644     | 0% | 0.94 | 0.38 | 28.00 | 0.00 |
| hsa-miR-646     | 0% | 0.94 | 0.38 | 28.00 | 0.00 |
| hsa-miR-647     | 0% | 0.94 | 0.38 | 28.00 | 0.00 |
| hsa-miR-648     | 0% | 0.94 | 0.38 | 28.00 | 0.00 |
| hsa-miR-649     | 0% | 0.94 | 0.38 | 28.00 | 0.00 |
| hsa-miR-650     | 0% | 0.94 | 0.38 | 28.00 | 0.00 |
| hsa-miR-651-5   | 0% | 0.94 | 0.38 | 28.00 | 0.00 |
| hsa-miR-653-5p  | 0% | 0.94 | 0.38 | 28.00 | 0.00 |
| hsa-miR-654-3p  | 0% | 0.94 | 0.38 | 28.00 | 0.00 |
| hsa-miR-654-5p  | 0% | 0.94 | 0.38 | 28.00 | 0.00 |
| hsa-miR-656-3p  | 0% | 0.94 | 0.38 | 28.00 | 0.00 |
| hsa-miR-657     | 0% | 0.94 | 0.38 | 28.00 | 0.00 |
| hsa-miR-658     | 0% | 0.94 | 0.38 | 28.00 | 0.00 |
| hsa-miR-661     | 0% | 0.94 | 0.38 | 28.00 | 0.00 |
| hsa-miR-662     | 0% | 0.94 | 0.38 | 28.00 | 0.00 |
| hsa-miR-664a-3p | 0% | 0.94 | 0.38 | 28.00 | 0.00 |
| hsa-miR-665     | 0% | 0.94 | 0.38 | 28.00 | 0.00 |
| hsa-miR-668-3p  | 0% | 0.94 | 0.38 | 28.00 | 0.00 |
| hsa-miR-672     | 0% | 0.94 | 0.38 | 28.00 | 0.00 |
| hsa-miR-674     | 0% | 0.94 | 0.38 | 28.00 | 0.00 |
| hsa-miR-675-5p  | 0% | 0.94 | 0.38 | 28.00 | 0.00 |
| hsa-miR-7-2-3   | 0% | 0.94 | 0.38 | 28.00 | 0.00 |
| hsa-miR-708-3p  | 0% | 0.94 | 0.38 | 28.00 | 0.00 |
| hsa-miR-765     | 0% | 0.94 | 0.38 | 28.00 | 0.00 |
| hsa-miR-767-3p  | 0% | 0.94 | 0.38 | 28.00 | 0.00 |
| hsa-miR-767-5p  | 0% | 0.94 | 0.38 | 28.00 | 0.00 |
| hsa-miR-769-3   | 0% | 0.94 | 0.38 | 28.00 | 0.00 |
| hsa-miR-770-5p  | 0% | 0.94 | 0.38 | 28.00 | 0.00 |
| hsa-miR-802     | 0% | 0.94 | 0.38 | 28.00 | 0.00 |
| hsa-miR-871     | 0% | 0.94 | 0.38 | 28.00 | 0.00 |
| hsa-miR-872     | 0% | 0.94 | 0.38 | 28.00 | 0.00 |
| hsa-miR-875-3   | 0% | 0.94 | 0.38 | 28.00 | 0.00 |
| hsa-miR-875-5p  | 0% | 0.94 | 0.38 | 28.00 | 0.00 |
| hsa-miR-876-3p  | 0% | 0.94 | 0.38 | 28.00 | 0.00 |
| hsa-miR-876-5p  | 0% | 0.94 | 0.38 | 28.00 | 0.00 |
| hsa-miR-885-3p  | 0% | 0.94 | 0.38 | 28.00 | 0.00 |
| hsa-miR-887-3p  | 0% | 0.94 | 0.38 | 28.00 | 0.00 |
| hsa-miR-888-3   | 0% | 0.94 | 0.38 | 28.00 | 0.00 |
| hsa-miR-891a-5  | 0% | 0.94 | 0.38 | 28.00 | 0.00 |
| hsa-miR-891b    | 0% | 0.94 | 0.38 | 28.00 | 0.00 |

|                  |    |      |      |       |      |
|------------------|----|------|------|-------|------|
| hsa-miR-892a     | 0% | 0.94 | 0.38 | 28.00 | 0.00 |
| hsa-miR-892b     | 0% | 0.94 | 0.38 | 28.00 | 0.00 |
| hsa-miR-920      | 0% | 0.94 | 0.38 | 28.00 | 0.00 |
| hsa-miR-921      | 0% | 0.94 | 0.38 | 28.00 | 0.00 |
| hsa-miR-922      | 0% | 0.94 | 0.38 | 28.00 | 0.00 |
| hsa-miR-924      | 0% | 0.94 | 0.38 | 28.00 | 0.00 |
| hsa-miR-92a-1-5p | 0% | 0.94 | 0.38 | 28.00 | 0.00 |
| hsa-miR-92a-2-5  | 0% | 0.94 | 0.38 | 28.00 | 0.00 |
| hsa-miR-92b-5    | 0% | 0.94 | 0.38 | 28.00 | 0.00 |
| hsa-miR-933      | 0% | 0.94 | 0.38 | 28.00 | 0.00 |
| hsa-miR-934      | 0% | 0.94 | 0.38 | 28.00 | 0.00 |
| hsa-miR-935      | 0% | 0.94 | 0.38 | 28.00 | 0.00 |
| hsa-miR-936      | 0% | 0.94 | 0.38 | 28.00 | 0.00 |
| hsa-miR-937-3p   | 0% | 0.94 | 0.38 | 28.00 | 0.00 |
| hsa-miR-938      | 0% | 0.94 | 0.38 | 28.00 | 0.00 |
| hsa-miR-939-5p   | 0% | 0.94 | 0.38 | 28.00 | 0.00 |
| hsa-miR-941      | 0% | 0.94 | 0.38 | 28.00 | 0.00 |
| hsa-miR-944      | 0% | 0.94 | 0.38 | 28.00 | 0.00 |
| hsa-miR-96-3     | 0% | 0.94 | 0.38 | 28.00 | 0.00 |
| hsa-miR-96-5p    | 0% | 0.94 | 0.38 | 28.00 | 0.00 |
| mmu-miR-129-3p   | 0% | 0.94 | 0.38 | 28.00 | 0.00 |
| mmu-miR-153      | 0% | 0.94 | 0.38 | 28.00 | 0.00 |
| mmu-miR-187      | 0% | 0.94 | 0.38 | 28.00 | 0.00 |
| mmu-miR-496      | 0% | 0.94 | 0.38 | 28.00 | 0.00 |
| mmu-miR-499      | 0% | 0.94 | 0.38 | 28.00 | 0.00 |
| mmu-miR-615      | 0% | 0.94 | 0.38 | 28.00 | 0.00 |
| mmu-miR-96       | 0% | 0.94 | 0.38 | 28.00 | 0.00 |
| rno-miR-29c      | 0% | 0.94 | 0.38 | 28.00 | 0.00 |

\*\* Those EV-miRNAs that had a Ct value greater than 28 were coded as 28 (unexpressed)

^ Normalized Ct values were normalized using the global mean.

Supplemental Table S2: Fold-change analysis of day one fertilization

| EV-miRNA name   | Fold Change | p-value |
|-----------------|-------------|---------|
| hsa-miR-192     | 1.80        | 0.01    |
| hsa-miR-542-3p  | 1.34        | 0.02    |
| hsa-miR-29a     | 1.28        | 0.03    |
| hsa-let-7c      | 1.49        | 0.03    |
| hsa-miR-92a     | 1.52        | 0.03    |
| hsa-miR-503     | 1.50        | 0.03    |
| hsa-miR-122     | -1.47       | 0.04    |
| hsa-miR-31-3p   | 1.47        | 0.04    |
| hsa-miR-210     | 3.79        | 0.04    |
| hsa-miR-98      | 1.71        | 0.04    |
| hsa-miR-130b    | 1.65        | 0.05    |
| hsa-miR-22      | 1.37        | 0.05    |
| hsa-miR-20a     | 1.34        | 0.06    |
| hsa-miR-539     | -1.12       | 0.06    |
| hsa-miR-28      | 1.41        | 0.06    |
| hsa-miR-19a     | 1.62        | 0.06    |
| hsa-miR-17      | 1.33        | 0.07    |
| hsa-miR-885-5p  | -1.41       | 0.07    |
| hsa-miR-320B    | 1.45        | 0.07    |
| hsa-miR-184     | 1.27        | 0.08    |
| hsa-miR-301     | 1.40        | 0.08    |
| hsa-miR-99b     | -1.34       | 0.08    |
| hsa-miR-532     | 1.52        | 0.08    |
| hsa-miR-15b     | 1.33        | 0.09    |
| hsa-miR-328     | 1.40        | 0.09    |
| hsa-miR-146a    | 1.72        | 0.09    |
| rno-miR-7       | 1.91        | 0.09    |
| hsa-miR-181a    | 1.48        | 0.09    |
| hsa-miR-106a    | 1.30        | 0.09    |
| hsa-miR-132     | 1.53        | 0.09    |
| hsa-miR-652     | 1.37        | 0.10    |
| hsa-miR-127     | 1.47        | 0.10    |
| hsa-miR-16      | 1.40        | 0.11    |
| hsa-let-7a      | 3.07        | 0.11    |
| hsa-miR-193b-5p | 1.36        | 0.11    |
| hsa-miR-28-3p   | 1.79        | 0.12    |
| hsa-miR-345     | 1.27        | 0.12    |
| hsa-miR-21      | 2.18        | 0.12    |

|                 |       |      |
|-----------------|-------|------|
| hsa-miR-26b     | 1.41  | 0.12 |
| hsa-miR-202-3p  | 1.45  | 0.13 |
| hsa-miR-152     | 1.49  | 0.13 |
| hsa-miR-30a-3p  | 1.49  | 0.14 |
| hsa-miR-320     | 1.37  | 0.14 |
| hsa-miR-130a    | 1.37  | 0.14 |
| hsa-miR-454     | 1.57  | 0.15 |
| hsa-miR-128a    | 1.24  | 0.15 |
| hsa-miR-25      | 1.41  | 0.15 |
| hsa-miR-29a-5p  | 1.48  | 0.16 |
| hsa-miR-424-3p  | 1.33  | 0.16 |
| hsa-miR-15a     | 1.24  | 0.16 |
| mmu-miR-140     | 1.37  | 0.18 |
| hsa-miR-212     | 1.27  | 0.18 |
| hsa-miR-365     | 1.47  | 0.19 |
| hsa-miR-194     | 1.34  | 0.19 |
| hsa-miR-106b    | 1.22  | 0.19 |
| hsa-miR-19b     | 1.17  | 0.19 |
| hsa-miR-99b-3p  | 1.35  | 0.19 |
| hsa-miR-497     | 1.22  | 0.19 |
| hsa-miR-411     | 1.29  | 0.20 |
| hsa-miR-141     | -1.18 | 0.20 |
| hsa-let-7d      | 1.28  | 0.21 |
| hsa-miR-10b-3p  | -1.32 | 0.21 |
| mmu-miR-495     | 1.43  | 0.21 |
| hsa-miR-339-5p  | 1.93  | 0.22 |
| hsa-miR-548b-5p | -1.02 | 0.22 |
| hsa-miR-148a    | 1.33  | 0.23 |
| hsa-miR-18a     | 1.30  | 0.25 |
| hsa-miR-103     | 1.23  | 0.25 |
| hsa-miR-30e-3p  | 1.32  | 0.26 |
| hsa-miR-1274A   | 1.27  | 0.27 |
| hsa-miR-331     | 1.20  | 0.28 |
| hsa-miR-27a     | 1.30  | 0.28 |
| hsa-miR-204     | 1.43  | 0.28 |
| hsa-miR-145     | 1.50  | 0.29 |
| hsa-miR-34a-3p  | 1.50  | 0.29 |
| hsa-miR-376c    | 1.48  | 0.29 |
| hsa-miR-508     | 1.23  | 0.29 |
| hsa-miR-886-5p  | 1.28  | 0.30 |
| hsa-miR-26a     | 1.28  | 0.31 |
| hsa-miR-423-5p  | 1.31  | 0.31 |

|                 |       |      |
|-----------------|-------|------|
| hsa-miR-424     | 1.06  | 0.32 |
| hsa-miR-597     | -1.18 | 0.32 |
| hsa-miR-186     | 1.35  | 0.33 |
| hsa-miR-886-3p  | 1.24  | 0.33 |
| hsa-miR-590-5p  | 1.25  | 0.33 |
| hsa-miR-324-5p  | 1.25  | 0.34 |
| hsa-miR-10b-5p  | -1.21 | 0.35 |
| hsa-miR-223     | 1.32  | 0.35 |
| hsa-miR-30c     | 1.48  | 0.35 |
| mmu-miR-491     | 1.21  | 0.35 |
| hsa-miR-151-3p  | 1.20  | 0.36 |
| hsa-miR-1290    | -1.18 | 0.36 |
| mmu-miR-93      | 1.31  | 0.36 |
| hsa-let-7e      | 1.88  | 0.37 |
| hsa-miR-1274B   | 1.14  | 0.37 |
| hsa-miR-30b     | 1.31  | 0.37 |
| hsa-miR-195     | 1.20  | 0.38 |
| hsa-miR-125a-5p | 1.23  | 0.38 |
| hsa-miR-410     | 1.20  | 0.38 |
| hsa-miR-200b    | -1.14 | 0.40 |
| hsa-miR-484     | 1.36  | 0.40 |
| hsa-miR-199a    | -1.11 | 0.41 |
| hsa-miR-374     | 1.17  | 0.41 |
| hsa-miR-193a-5p | -1.07 | 0.41 |
| hsa-miR-744     | 1.20  | 0.41 |
| hsa-miR-296     | 1.33  | 0.42 |
| hsa-miR-142-3p  | 1.30  | 0.44 |
| hsa-miR-375     | 1.16  | 0.44 |
| hsa-miR-449b    | -1.08 | 0.44 |
| hsa-miR-203     | 1.16  | 0.44 |
| mmu-miR-374-5p  | 1.20  | 0.46 |
| hsa-let-7g      | 1.18  | 0.46 |
| hsa-miR-10a     | -1.06 | 0.47 |
| hsa-miR-93      | 1.09  | 0.47 |
| hsa-miR-483-5p  | 1.18  | 0.48 |
| hsa-miR-199a-3p | 1.34  | 0.50 |
| hsa-miR-30a-5p  | 1.18  | 0.50 |
| hsa-miR-548c-5p | -1.03 | 0.50 |
| hsa-miR-1303    | -1.05 | 0.51 |
| hsa-miR-574-3p  | 1.19  | 0.51 |
| hsa-miR-27b     | 1.12  | 0.52 |
| hsa-miR-29b     | 1.17  | 0.53 |

|                 |       |      |
|-----------------|-------|------|
| hsa-miR-509-5p  | 1.15  | 0.54 |
| hsa-miR-125b    | 1.15  | 0.54 |
| hsa-miR-191     | 1.12  | 0.55 |
| hsa-miR-324-3p  | 1.15  | 0.55 |
| hsa-miR-629     | -1.05 | 0.56 |
| hsa-miR-135a    | 1.00  | 0.56 |
| hsa-miR-24      | 1.12  | 0.59 |
| hsa-miR-133a    | -1.05 | 0.59 |
| hsa-miR-139-5p  | 1.05  | 0.59 |
| hsa-miR-638     | -1.13 | 0.60 |
| mmu-miR-134     | 1.16  | 0.61 |
| hsa-miR-150     | -1.08 | 0.63 |
| mmu-miR-379     | 1.18  | 0.63 |
| hsa-miR-155     | 1.06  | 0.65 |
| hsa-miR-645     | -1.05 | 0.65 |
| hsa-miR-942     | 1.10  | 0.65 |
| hsa-miR-888     | -1.26 | 0.65 |
| hsa-miR-708     | 1.10  | 0.67 |
| hsa-miR-1226-5p | 1.17  | 0.68 |
| hsa-miR-335     | -1.10 | 0.68 |
| hsa-miR-221     | 1.33  | 0.69 |
| hsa-miR-1291    | 1.03  | 0.69 |
| hsa-miR-193b    | 1.21  | 0.70 |
| hsa-miR-323-3p  | 1.14  | 0.71 |
| hsa-miR-339-3p  | 1.05  | 0.71 |
| hsa-miR-1180    | 1.03  | 0.71 |
| hsa-miR-532-3p  | 1.06  | 0.73 |
| hsa-miR-34a     | 1.06  | 0.73 |
| hsa-miR-202     | 1.10  | 0.74 |
| hsa-miR-34b     | 1.02  | 0.74 |
| hsa-miR-370     | 1.35  | 0.74 |
| hsa-miR-99a     | 1.14  | 0.75 |
| mmu-miR-451     | 1.13  | 0.76 |
| hsa-miR-660     | 1.07  | 0.76 |
| hsa-miR-20b     | 1.10  | 0.77 |
| hsa-miR-148b    | 1.08  | 0.78 |
| hsa-miR-601     | 1.07  | 0.78 |
| hsa-miR-222     | 1.18  | 0.78 |
| hsa-miR-483-3p  | 1.08  | 0.78 |
| hsa-miR-95      | 1.01  | 0.79 |
| hsa-miR-769-5p  | 1.10  | 0.80 |
| hsa-miR-455     | 1.03  | 0.82 |

|                |       |      |
|----------------|-------|------|
| hsa-miR-149    | 1.24  | 0.82 |
| hsa-miR-146b   | 1.13  | 0.84 |
| hsa-miR-214    | 1.21  | 0.85 |
| hsa-miR-361    | 1.05  | 0.85 |
| hsa-miR-126    | -1.03 | 0.85 |
| hsa-miR-218    | 1.10  | 0.85 |
| hsa-miR-143    | -1.01 | 0.87 |
| hsa-miR-30d    | -1.02 | 0.87 |
| hsa-miR-31     | 1.06  | 0.89 |
| hsa-miR-572    | 1.10  | 0.90 |
| hsa-miR-720    | 1.19  | 0.90 |
| hsa-miR-29c    | -1.08 | 0.92 |
| hsa-miR-381    | 1.01  | 0.92 |
| hsa-miR-342-3p | 1.10  | 0.92 |
| hsa-miR-766    | 1.14  | 0.92 |
| hsa-miR-101    | 1.05  | 0.94 |
| hsa-miR-144    | 1.14  | 0.95 |
| hsa-miR-598    | 1.01  | 0.96 |
| hsa-miR-190    | 1.11  | 0.96 |
| hsa-miR-34c    | 1.08  | 0.96 |
| hsa-miR-543    | -1.01 | 0.97 |
| hsa-miR-126-5p | 1.03  | 0.98 |
| hsa-miR-205    | 1.00  | 0.99 |
| hsa-miR-487b   | 1.04  | 0.99 |
| hsa-miR-376a   | 1.00  | 0.99 |
| hsa-miR-100    | -1.02 | 1.00 |
| hsa-miR-409-3p | 1.00  | 1.00 |
| hsa-miR-185    | -1.01 | 1.00 |



Supplemental Table S3: Fold-change analysis of day three embryo quality

| EV-miRNA name   | Fold Change | p-value |
|-----------------|-------------|---------|
| hsa-miR-214     | -3.04       | 0.01    |
| hsa-miR-145     | -2.44       | 0.03    |
| hsa-miR-454     | -2.43       | 0.03    |
| hsa-miR-888     | 2.08        | 0.05    |
| hsa-miR-146a    | -1.77       | 0.07    |
| hsa-miR-202     | -1.36       | 0.07    |
| hsa-miR-19b     | -1.87       | 0.08    |
| hsa-miR-18a     | -1.43       | 0.08    |
| hsa-miR-193b    | -1.75       | 0.08    |
| hsa-miR-193a-5p | -1.43       | 0.10    |
| hsa-miR-708     | -1.60       | 0.11    |
| mmu-miR-93      | -1.65       | 0.11    |
| hsa-miR-597     | -1.31       | 0.12    |
| hsa-miR-132     | -1.39       | 0.12    |
| hsa-miR-126-5p  | -1.68       | 0.13    |
| hsa-miR-483-3p  | 1.63        | 0.14    |
| hsa-miR-16      | -1.40       | 0.14    |
| hsa-miR-194     | -1.22       | 0.14    |
| hsa-miR-148b    | -1.23       | 0.15    |
| hsa-miR-143     | -1.57       | 0.15    |
| hsa-miR-128a    | -1.20       | 0.17    |
| hsa-miR-1291    | -1.31       | 0.17    |
| hsa-miR-93      | 1.09        | 0.18    |
| hsa-miR-99a     | -1.90       | 0.18    |
| hsa-miR-29c     | -1.56       | 0.18    |
| hsa-miR-324-3p  | -1.31       | 0.19    |
| hsa-miR-574-3p  | -1.47       | 0.19    |
| hsa-miR-142-3p  | -1.47       | 0.22    |
| hsa-miR-205     | -1.40       | 0.22    |
| hsa-miR-24      | -1.60       | 0.22    |
| hsa-miR-320B    | -1.29       | 0.22    |
| hsa-miR-127     | -1.26       | 0.22    |
| hsa-miR-342-3p  | -1.30       | 0.23    |
| hsa-miR-144     | -1.52       | 0.23    |
| hsa-miR-21      | -2.06       | 0.23    |
| hsa-miR-22      | -1.22       | 0.23    |
| hsa-miR-652     | 1.07        | 0.24    |

|                 |       |      |
|-----------------|-------|------|
| hsa-miR-193b-5p | -1.23 | 0.24 |
| hsa-miR-190     | -1.20 | 0.24 |
| hsa-miR-152     | -1.34 | 0.24 |
| hsa-miR-202-3p  | -1.20 | 0.25 |
| hsa-miR-328     | -1.26 | 0.25 |
| hsa-let-7c      | -1.34 | 0.26 |
| hsa-let-7a      | -2.30 | 0.26 |
| mmu-miR-495     | -1.31 | 0.26 |
| hsa-miR-409-3p  | -1.56 | 0.27 |
| hsa-miR-27a     | -1.33 | 0.27 |
| hsa-miR-223     | -1.37 | 0.27 |
| hsa-miR-19a     | -1.29 | 0.28 |
| hsa-miR-20a     | -1.22 | 0.28 |
| hsa-miR-660     | -1.23 | 0.28 |
| mmu-miR-140     | -1.27 | 0.28 |
| hsa-miR-548b-5p | -1.14 | 0.29 |
| hsa-miR-92a     | -1.21 | 0.29 |
| hsa-miR-106a    | -1.22 | 0.30 |
| hsa-miR-28-3p   | -1.49 | 0.30 |
| hsa-let-7g      | -1.28 | 0.31 |
| hsa-miR-17      | -1.23 | 0.31 |
| hsa-miR-27b     | -1.29 | 0.31 |
| hsa-miR-25      | -1.26 | 0.31 |
| hsa-miR-100     | -1.43 | 0.32 |
| hsa-miR-320     | -1.23 | 0.32 |
| hsa-miR-125a-5p | -1.28 | 0.32 |
| hsa-miR-766     | 1.12  | 0.32 |
| hsa-miR-296     | -1.43 | 0.34 |
| hsa-miR-423-5p  | -1.34 | 0.34 |
| hsa-miR-199a-3p | -1.32 | 0.34 |
| hsa-miR-222     | -1.58 | 0.34 |
| hsa-miR-324-5p  | -1.22 | 0.34 |
| hsa-miR-10a     | -1.25 | 0.35 |
| hsa-miR-146b    | -1.35 | 0.35 |
| hsa-miR-130a    | -1.26 | 0.35 |
| hsa-miR-532     | -1.28 | 0.35 |
| hsa-miR-29a-5p  | -1.25 | 0.36 |
| hsa-miR-381     | 1.10  | 0.36 |
| hsa-let-7d      | -1.19 | 0.36 |
| hsa-miR-186     | -1.25 | 0.37 |
| hsa-let-7e      | -1.35 | 0.37 |
| hsa-miR-28      | -1.15 | 0.37 |

|                |       |      |
|----------------|-------|------|
| hsa-miR-331    | -1.16 | 0.38 |
| hsa-miR-212    | -1.22 | 0.38 |
| hsa-miR-195    | -1.22 | 0.38 |
| hsa-miR-15a    | -1.15 | 0.39 |
| hsa-miR-30e-3p | -1.43 | 0.39 |
| hsa-miR-101    | -1.04 | 0.40 |
| hsa-miR-15b    | -1.18 | 0.40 |
| hsa-miR-221    | -1.32 | 0.42 |
| hsa-miR-122    | 1.16  | 0.43 |
| hsa-miR-31-3p  | -1.18 | 0.43 |
| hsa-miR-508    | -1.15 | 0.44 |
| hsa-miR-497    | -1.09 | 0.44 |
| mmu-miR-451    | -1.28 | 0.45 |
| hsa-miR-484    | -1.20 | 0.45 |
| hsa-miR-532-3p | -1.19 | 0.45 |
| hsa-miR-543    | 1.08  | 0.46 |
| hsa-miR-99b-3p | -1.16 | 0.46 |
| hsa-miR-10b-5p | -1.16 | 0.46 |
| hsa-miR-483-5p | -1.14 | 0.46 |
| hsa-miR-942    | -1.14 | 0.46 |
| hsa-miR-376c   | -1.23 | 0.46 |
| hsa-miR-135a   | -1.18 | 0.47 |
| hsa-miR-424-3p | -1.18 | 0.47 |
| hsa-miR-539    | -1.07 | 0.48 |
| hsa-miR-509-5p | -1.22 | 0.48 |
| hsa-miR-503    | -1.12 | 0.49 |
| hsa-miR-185    | -1.11 | 0.49 |
| hsa-miR-10b-3p | -1.29 | 0.50 |
| hsa-miR-34c    | 1.03  | 0.50 |
| hsa-miR-95     | -1.14 | 0.50 |
| hsa-miR-130b   | -1.09 | 0.51 |
| hsa-miR-30c    | -1.17 | 0.51 |
| hsa-miR-26b    | -1.14 | 0.51 |
| hsa-miR-106b   | -1.12 | 0.52 |
| hsa-miR-30a-5p | -1.15 | 0.52 |
| hsa-miR-191    | 1.01  | 0.53 |
| hsa-miR-155    | 1.02  | 0.54 |
| hsa-miR-204    | -1.24 | 0.54 |
| hsa-miR-629    | -1.10 | 0.54 |
| hsa-miR-601    | 1.06  | 0.54 |
| hsa-miR-361    | -1.17 | 0.55 |
| hsa-miR-150    | -1.31 | 0.55 |

|                 |       |      |
|-----------------|-------|------|
| hsa-miR-30a-3p  | -1.29 | 0.55 |
| hsa-miR-30d     | -1.23 | 0.55 |
| rno-miR-7       | -1.30 | 0.55 |
| hsa-miR-218     | -1.11 | 0.56 |
| hsa-miR-590-5p  | -1.15 | 0.56 |
| hsa-miR-29a     | -1.07 | 0.57 |
| hsa-miR-638     | 1.15  | 0.57 |
| hsa-miR-345     | -1.21 | 0.59 |
| hsa-miR-99b     | 1.09  | 0.59 |
| hsa-miR-374     | -1.22 | 0.60 |
| hsa-miR-301     | -1.12 | 0.61 |
| hsa-miR-375     | -1.22 | 0.61 |
| hsa-miR-34a     | -1.10 | 0.61 |
| hsa-miR-30b     | -1.09 | 0.61 |
| hsa-miR-424     | -1.03 | 0.61 |
| hsa-miR-181a    | -1.13 | 0.62 |
| hsa-miR-199a    | -1.15 | 0.63 |
| hsa-miR-376a    | -1.12 | 0.63 |
| mmu-miR-379     | 1.03  | 0.64 |
| hsa-miR-200b    | -1.12 | 0.65 |
| hsa-miR-34a-3p  | 1.28  | 0.65 |
| hsa-miR-339-5p  | -1.38 | 0.66 |
| hsa-miR-365     | -1.20 | 0.66 |
| hsa-miR-598     | 1.05  | 0.66 |
| hsa-miR-410     | -1.09 | 0.67 |
| hsa-miR-26a     | -1.09 | 0.67 |
| hsa-miR-29b     | -1.09 | 0.69 |
| hsa-miR-323-3p  | 1.05  | 0.70 |
| hsa-miR-1180    | 1.04  | 0.71 |
| hsa-miR-1226-5p | -1.12 | 0.71 |
| hsa-miR-31      | 1.06  | 0.72 |
| hsa-miR-572     | 1.48  | 0.72 |
| hsa-miR-886-3p  | 1.21  | 0.73 |
| hsa-miR-1303    | -1.04 | 0.74 |
| hsa-miR-141     | -1.11 | 0.75 |
| hsa-miR-885-5p  | 1.10  | 0.75 |
| hsa-miR-203     | -1.01 | 0.75 |
| hsa-miR-34b     | 1.01  | 0.75 |
| hsa-miR-149     | -1.23 | 0.77 |
| hsa-miR-20b     | -1.16 | 0.77 |
| hsa-miR-645     | 1.05  | 0.77 |
| hsa-miR-744     | 1.02  | 0.78 |

|                 |       |      |
|-----------------|-------|------|
| mmu-miR-491     | 1.05  | 0.78 |
| mmu-miR-134     | -1.06 | 0.78 |
| hsa-miR-720     | 1.04  | 0.79 |
| hsa-miR-98      | -1.09 | 0.81 |
| hsa-miR-1274B   | -1.02 | 0.81 |
| hsa-miR-151-3p  | 1.04  | 0.83 |
| hsa-miR-184     | 1.07  | 0.84 |
| hsa-miR-210     | -1.53 | 0.84 |
| hsa-miR-339-3p  | -1.04 | 0.85 |
| hsa-miR-487b    | 1.01  | 0.85 |
| hsa-miR-125b    | -1.05 | 0.85 |
| hsa-miR-103     | -1.00 | 0.86 |
| hsa-miR-139-5p  | -1.05 | 0.86 |
| hsa-miR-335     | -1.04 | 0.87 |
| hsa-miR-449b    | -1.10 | 0.88 |
| hsa-miR-411     | -1.02 | 0.89 |
| hsa-miR-1290    | -1.11 | 0.90 |
| mmu-miR-374-5p  | -1.10 | 0.91 |
| hsa-miR-133a    | -1.12 | 0.93 |
| hsa-miR-548c-5p | 1.01  | 0.94 |
| hsa-miR-886-5p  | 1.06  | 0.94 |
| hsa-miR-192     | -1.01 | 0.96 |
| hsa-miR-455     | -1.07 | 0.96 |
| hsa-miR-1274A   | -1.11 | 0.99 |
| hsa-miR-126     | -1.09 | 1.00 |
| hsa-miR-148a    | 1.05  | 1.00 |
| hsa-miR-370     | -1.25 | 1.00 |
| hsa-miR-542-3p  | -1.01 | 1.00 |
| hsa-miR-769-5p  | -1.05 | 1.00 |

**Supplementary Table S4: Expression of EV-miRNA in more than 15% of the FF samples**

| EV-miRNA Name    | Martinez et al. (N=126) | Machtinger et al., 2016 (N=40) |
|------------------|-------------------------|--------------------------------|
| hsa-let-7a       | 26%                     | not detected                   |
| hsa-let-7c       | 99%                     | not detected                   |
| hsa-let-7d       | 83%                     | not detected                   |
| hsa-let-7e       | 60%                     | not detected                   |
| hsa-let-7g       | 81%                     | not detected                   |
| hsa-miR-7-3p     | not detected            | 83%                            |
| hsa-miR-9-3p     | not detected            | 23%                            |
| hsa-miR-10a      | 52%                     | not detected                   |
| hsa-miR-10b-3p   | 51%                     | 90%                            |
| hsa-miR-10b-5p   | 25%                     | not detected                   |
| hsa-miR-15a      | 61%                     | not detected                   |
| hsa-miR-15b      | 98%                     | not detected                   |
| hsa-miR-16-1-3p  | 100%                    | 48%                            |
| hsa-miR-16-5p    | not detected            | 45%                            |
| hsa-miR-17       | 100%                    | not detected                   |
| hsa-miR-18a-3p   | 24%                     | 48%                            |
| hsa-miR-19a      | 91%                     | not detected                   |
| hsa-miR-19b-3p   | 98%                     | 30%                            |
| hsa-miR-19b-1-5p | not detected            | 20%                            |
| hsa-miR-20a      | 100%                    | 55%                            |
| hsa-miR-20b      | 42%                     | not detected                   |
| hsa-miR-21       | 87%                     | 25%                            |
| hsa-miR-22       | 49%                     | 53%                            |
| hsa-miR-24-3p    | 98%                     | 15%                            |
| hsa-miR-25       | 98%                     | not detected                   |
| hsa-miR-26a      | 100%                    | 53%                            |
| hsa-miR-26b      | 99%                     | 20%                            |
| hsa-miR-27a      | 58%                     | 58%                            |
| hsa-miR-27b      | 90%                     | 33%                            |
| hsa-miR-28       | 100%                    | not detected                   |
| hsa-miR-28-3p    | 75%                     | not detected                   |
| hsa-miR-296      | 66%                     | not detected                   |
| hsa-miR-29a      | 36%                     | not detected                   |
| hsa-miR-29a-5p   | 95%                     | 33%                            |
| hsa-miR-29b      | 65%                     | not detected                   |
| hsa-miR-29c      | 88%                     | 45%                            |
| hsa-miR-30a-3p   | 89%                     | 48%                            |
| hsa-miR-30a-5p   | 100%                    | 75%                            |

|                   |              |              |
|-------------------|--------------|--------------|
| hsa-miR-30b       | 100%         | not detected |
| hsa-miR-30c       | 98%          | not detected |
| hsa-miR-30d-5p    | 98%          | 100%         |
| hsa-miR-30d-3p    |              | 23%          |
| hsa-miR-30e-3p    | 89%          | 40%          |
| hsa-miR-31        | 78%          | not detected |
| hsa-miR-31-3p     | 95%          | 73%          |
| hsa-miR-33a-3p    | not detected | not detected |
| hsa-miR-34a       | 60%          | 55%          |
| hsa-miR-34a-3p    | 75%          | 28%          |
| hsa-miR-34b-3p    | 18%          | 48%          |
| hsa-miR-34c       | 16%          | not detected |
| hsa-miR-92a-3p    | 100%         | not detected |
| hsa-miR-92a-1-5p  | not detected | 15%          |
| hsa-miR-93        | 17%          | 63%          |
| hsa-miR-95        | 56%          | not detected |
| hsa-miR-98        | 18%          | not detected |
| hsa-miR-99a       | 94%          | 63%          |
| hsa-miR-99b       | 25%          | not detected |
| hsa-miR-99b-3p    | 100%         | 43%          |
| hsa-miR-100       | 82%          | not detected |
| hsa-miR-101       | 27%          | not detected |
| hsa-miR-103       | 94%          | not detected |
| hsa-miR-106a      | 100%         | not detected |
| hsa-miR-106b      | 100%         | not detected |
| hsa-miR-122       | 19%          | not detected |
| hsa-miR-125a-5p   | 52%          | not detected |
| hsa-miR-125b-1-3p | 98%          | 25%          |
| hsa-miR-126       | 78%          | not detected |
| hsa-miR-126-5p    | 89%          | 75%          |
| hsa-miR-127       | 99%          | not detected |
| hsa-miR-128a      | 53%          | not detected |
| hsa-miR-130a      | 99%          | not detected |
| hsa-miR-130b-3p   | 95%          | not detected |
| hsa-miR-132-3p    | 100%         | 20%          |
| hsa-miR-133a      | 34%          | not detected |
| hsa-miR-135a      | 42%          | not detected |
| hsa-miR-136-3p    | not detected | 78%          |
| hsa-miR-139-5p    | 73%          | not detected |
| hsa-miR-141       | 22%          | not detected |

|                 |              |              |
|-----------------|--------------|--------------|
| hsa-miR-142-3p  | 89%          | not detected |
| hsa-miR-143     | 75%          | not detected |
| hsa-miR-144     | 19%          | 63%          |
| hsa-miR-145     | 64%          | 33%          |
| hsa-miR-146a    | 94%          | not detected |
| hsa-miR-146b    | 99%          | not detected |
| hsa-miR-148a    | 79%          | not detected |
| hsa-miR-148b    | 44%          | 38%          |
| hsa-miR-149     | 37%          | not detected |
| hsa-miR-150     | 97%          | not detected |
| hsa-miR-151a-5p | not detected | 48%          |
| hsa-miR-151-3p  | 49%          | 53%          |
| hsa-miR-152     | 90%          | not detected |
| hsa-miR-155     | 17%          | not detected |
| hsa-miR-181a    | 89%          | 48%          |
| hsa-miR-184     | 54%          | not detected |
| hsa-miR-185     | 33%          | not detected |
| hsa-miR-186     | 88%          | not detected |
| hsa-miR-190b    | 25%          | 20%          |
| hsa-miR-191     | 99%          | 15%          |
| hsa-miR-192     | 92%          | not detected |
| hsa-miR-193a-5p | 56%          | not detected |
| hsa-miR-193b    | 54%          | not detected |
| hsa-miR-193b-3p | not detected | 23%          |
| hsa-miR-193b-5p | 100%         | 38%          |
| hsa-miR-194     | 37%          | not detected |
| hsa-miR-195     | 99%          | not detected |
| hsa-miR-199a    | 15%          | not detected |
| hsa-miR-199a-3p | 20%          | not detected |
| hsa-miR-200b    | 39%          | not detected |
| hsa-miR-202-5p  | 25%          | 68%          |
| hsa-miR-202-3p  | 98%          | not detected |
| hsa-miR-203     | 100%         | not detected |
| hsa-miR-204     | 87%          | not detected |
| hsa-miR-205     | 55%          | not detected |
| hsa-miR-206     | not detected | 68%          |
| hsa-miR-210     | 69%          | not detected |
| hsa-miR-212     | 100%         | not detected |
| hsa-miR-214     | 41%          | not detected |
| hsa-miR-218     | 100%         | not detected |



|                 |              |              |
|-----------------|--------------|--------------|
| hsa-miR-221     | 69%          | not detected |
| hsa-miR-222     | 88%          | 15%          |
| hsa-miR-223-3p  | 100%         | 28%          |
| hsa-miR-301     | 79%          | not detected |
| hsa-miR-320a    | 100%         | 15%          |
| hsa-miR-320b    | 77%          | 98%          |
| hsa-miR-323-3p  | 46%          | not detected |
| hsa-miR-324-3p  | 73%          | not detected |
| hsa-miR-324-5p  | 94%          | not detected |
| hsa-miR-328     | 100%         | not detected |
| hsa-miR-331     | 100%         | not detected |
| hsa-miR-335     | 93%          | not detected |
| hsa-miR-338-5p  | not detected | 23%          |
| hsa-miR-339-3p  | 23%          | not detected |
| hsa-miR-339-5p  | 23%          | not detected |
| hsa-miR-340-3p  | not detected | 63%          |
| hsa-miR-342-3p  | 23%          | not detected |
| hsa-miR-345     | 58%          | not detected |
| hsa-miR-361     | 79%          | not detected |
| hsa-miR-365     | 77%          | not detected |
| hsa-miR-370     | 15%          | not detected |
| hsa-miR-374     | 98%          | not detected |
| hsa-miR-375     | 91%          | not detected |
| hsa-miR-376a    | 95%          | not detected |
| hsa-miR-376c    | 87%          | not detected |
| hsa-miR-378a-3p | not detected | 50%          |
| hsa-miR-380-5p  | not detected | 78%          |
| hsa-miR-381     | 21%          | not detected |
| hsa-miR-409-3p  | 79%          | 60%          |
| hsa-miR-410     | 78%          | not detected |
| hsa-miR-411     | 90%          | not detected |
| hsa-miR-423-5p  | 71%          | not detected |
| hsa-miR-424     | 95%          | not detected |
| hsa-miR-424-3p  | 94%          | 70%          |
| hsa-miR-425-3p  | not detected | 40%          |
| hsa-miR-449b    | 17%          | not detected |
| hsa-miR-454-5p  | not detected | 38%          |
| has-miR-454-3p  | 49%          | not detected |
| hsa-miR-455     | 30%          | not detected |
| hsa-miR-483-3p  | 57%          | not detected |

|                 |              |              |
|-----------------|--------------|--------------|
| hsa-miR-483-5p  | 100%         | not detected |
| hsa-miR-484     | 98%          | not detected |
| hsa-miR-487b    | 17%          | not detected |
| hsa-miR-497-5p  | 36%          | 53%          |
| hsa-miR-503     | 94%          | not detected |
| hsa-miR-505-5p  | not detected | 65%          |
| hsa-miR-508     | 57%          | not detected |
| hsa-miR-509-5p  | 71%          | not detected |
| hsa-miR-520d-3p | not detected | 28%          |
| hsa-miR-520f-3p | not detected | 40%          |
| hsa-miR-532     | 85%          | not detected |
| hsa-miR-532-3p  | 55%          | not detected |
| hsa-miR-539     | 22%          | not detected |
| hsa-miR-542-3p  | 40%          | not detected |
| hsa-miR-543     | 48%          | 28%          |
| hsa-miR-548b-5p | 30%          | not detected |
| hsa-miR-548c-5p | 15%          | not detected |
| hsa-miR-550a-5p | not detected | 23%          |
| hsa-miR-564     | not detected | 33%          |
| hsa-miR-572     | 98%          | 83%          |
| hsa-miR-574-3p  | 94%          | not detected |
| hsa-miR-590-5p  | 95%          | not detected |
| has-miR-454-3p  | not detected | 70%          |
| hsa-miR-592     | not detected | 25%          |
| hsa-miR-597     | 62%          | not detected |
| hsa-miR-598     | 28%          | not detected |
| hsa-miR-601     | 48%          | 68%          |
| hsa-miR-603     | not detected | 35%          |
| hsa-miR-604     | not detected | 15%          |
| hsa-miR-616-5p  | not detected | 23%          |
| hsa-miR-629     | 55%          | 73%          |
| hsa-miR-638     | 72%          | 20%          |
| hsa-miR-645     | 78%          | 55%          |
| hsa-miR-649     | not detected | 38%          |
| hsa-miR-652     | 23%          | not detected |
| hsa-miR-660     | 90%          | not detected |
| has-miR-663B    | not detected | 75%          |
| hsa-miR-708     | 60%          | not detected |
| hsa-miR-720     | 99%          | 85%          |
| hsa-miR-744     | 60%          | 43%          |

|                  |              |              |
|------------------|--------------|--------------|
| hsa-miR-766      | 18%          | 43%          |
| hsa-miR-769-5p   | 25%          | not detected |
| hsa-miR-885-5p   | 52%          | not detected |
| hsa-miR-886-3p   | 99%          | not detected |
| hsa-miR-886-5p   | 87%          | not detected |
| hsa-miR-888      | 18%          | not detected |
| hsa-miR-942      | 85%          | 80%          |
| hsa-miR-1179     | not detected | 18%          |
| hsa-miR-1180     | 32%          | 45%          |
| hsa-miR-1226-5p  | 25%          | 78%          |
| hsa-miR-1227-3p  | not detected | 28%          |
| hsa-miR-1244     | not detected | 55%          |
| hsa-miR-1255b-5p | not detected | 78%          |
| hsa-miR-1274A    | 97%          | 53%          |
| hsa-miR-1274B    | 100%         | 50%          |
| hsa-miR-1276     | not detected | 40%          |
| hsa-miR-1290     | 50%          | 65%          |
| hsa-miR-1291     | 78%          | 88%          |
| hsa-miR-1300     | not detected | 70%          |
| hsa-miR-1303     | 33%          | 63%          |
| mmu-miR-140      | 86%          | not detected |
| mmu-miR-374-5p   | 89%          | not detected |
| mmu-miR-379      | 46%          | not detected |
| mmu-miR-451      | 98%          | not detected |
| mmu-miR-491      | 37%          | not detected |
| mmu-miR-495      | 45%          | not detected |
| mmu-miR-93       | 72%          | not detected |
| rno-miR-7        | 37%          | not detected |
